# Supplementary material for: FHL2 Inhibits SARS-CoV-2 Replication by Enhancing IFN-β Expression through Regulating IRF-3
Source: Int J Mol Sci. 2023 Dec 26;25(1):353. doi: 10.3390/ijms25010353 (PMC10778585; doi:10.3390/ijms25010353)
Supplement: Supplementary file 1 [file ijms-25-00353-s001.zip › Supplementary Tables.xlsx]

## Sheet: Table S1.Differential proteins
Gene name	Protein accession	padj	Fold change	Regulated Type
HKDC1	Q2TB90	2.87893e-05	10.3601	Up
HMGCR	P04035	4.46214e-05	7.1183	Up
PCLAF	Q15004	0.00167587	6.4534	Up
TSR2	Q969E8	0.000445237	6.3658	Up
BUB1	O43683	0.00024963	4.7707	Up
HMMR	O75330	0.00989463	4.2874	Up
CDC20	Q12834	0.000172707	4.2199	Up
CENPE	Q02224	0.00672359	4.1786	Up
NFXL1	Q6ZNB6	0.000337698	3.1457	Up
DEGS1	O15121	0.000464595	3.0531	Up
FTL	P02792	0.000200709	2.8632	Up
TTLL4	Q14679	0.00120632	2.8395	Up
FTH1	P02794	0.000514444	2.6328	Up
OCC1	Q8TAD7	0.0135632	2.6305	Up
SGO2	Q562F6	0.0053257	2.5778	Up
STK31	Q9BXU1	0.0238755	2.5264	Up
UBE2S	Q16763	0.000120216	2.5073	Up
MYL9	P24844	7.82168e-06	2.4499	Up
UBR7	Q8N806	0.0147468	2.3985	Up
MKLN1	Q9UL63	0.000184604	2.3981	Up
SQSTM1	Q13501	1.36747e-05	2.3969	Up
ARHGDIB	P52566	0.0417464	2.3749	Up
FHL2	Q14192	8.8929e-06	2.2985	Up
GLUL	P15104	1.39648e-06	2.2828	Up
ANLN	Q9NQW6	9.26849e-06	2.2648	Up
RRN3	Q9NYV6	0.00554457	2.2254	Up
TACC3	Q9Y6A5	2.67241e-05	2.2238	Up
MKRN2	Q9H000	0.000804801	2.2193	Up
CIZ1	Q9ULV3	0.000361241	2.1823	Up
MTR	Q99707	0.00904708	2.1733	Up
SULT1C4	O75897	0.00120663	2.1713	Up
GMNN	O75496	0.00775525	2.1436	Up
OTUD5	Q96G74	0.00148383	2.1404	Up
VWA1	Q6PCB0	0.0274507	2.1289	Up
KIF18B	Q86Y91	0.0134926	2.062	Up
SHCBP1	Q8NEM2	7.67909e-05	2.0542	Up
RAD18	Q9NS91	0.00950864	2.0304	Up
ZWINT	O95229	0.00305623	2.0231	Up
NES	P48681	1.90781e-06	2.0185	Up
AURKA	O14965	7.38376e-06	2.0102	Up
UBE2C	O00762	8.95771e-08	1.9889	Up
PLK1	P53350	1.48509e-05	1.9725	Up
SAMD4A	Q9UPU9	0.00210917	1.9457	Up
LATS1	O95835	0.00670737	1.9378	Up
XIAP	P98170	0.000245848	1.9304	Up
ASPM	Q8IZT6	0.0137303	1.9052	Up
MAP1LC3B2	A6NCE7	0.00039327	1.8712	Up
CCNB1	P14635	1.65113e-06	1.8699	Up
RAD51	Q06609	0.000321405	1.867	Up
CKS1B	P61024	0.000350658	1.8581	Up
SNX17	Q15036	0.00124115	1.8531	Up
TSR3	Q9UJK0	0.00054865	1.8419	Up
ZFAND3	Q9H8U3	0.000650894	1.8379	Up
FAM83D	Q9H4H8	8.44345e-07	1.8325	Up
ZC3H7B	Q9UGR2	0.00688265	1.8287	Up
ZNF629	Q9UEG4	0.000164312	1.8283	Up
DNA2	P51530	3.83159e-06	1.8282	Up
MYRF	Q9Y2G1	4.30612e-05	1.826	Up
CDC7	O00311	0.00656688	1.8048	Up
LIMD1	Q9UGP4	0.0063648	1.7959	Up
ADI1	Q9BV57	3.40274e-05	1.7748	Up
UCK2	Q9BZX2	3.83151e-05	1.7406	Up
TRAFD1	O14545	0.028658	1.7356	Up
CNBP	P62633	0.000667087	1.7322	Up
SARAF	Q96BY9	0.000376215	1.7228	Up
TK1	P04183	2.417e-06	1.7175	Up
HECTD1	Q9ULT8	5.63748e-05	1.7133	Up
UNC13D	Q70J99	3.40979e-05	1.713	Up
MCM10	Q7L590	0.0134422	1.7104	Up
PRC1	O43663	3.54226e-07	1.7094	Up
LRRC41	Q15345	0.000286951	1.7037	Up
CNTN2	Q02246	0.00714273	1.6979	Up
CRIP2	P52943	0.0146544	1.6972	Up
RMND5A	Q9H871	1.71454e-05	1.695	Up
CDCA3	Q99618	0.000233109	1.6907	Up
C1orf112	Q9NSG2	0.000613474	1.6897	Up
BUB1B	O60566	0.0019812	1.673	Up
BAG3	O95817	0.00065799	1.6695	Up
FOXJ3	Q9UPW0	0.0127906	1.6658	Up
TRIM16	O95361	0.00130371	1.6589	Up
DMAP1	Q9NPF5	0.00284428	1.6577	Up
HMGCS1	Q01581	9.87174e-06	1.6568	Up
SMYD4	Q8IYR2	0.0193232	1.6515	Up
TSPYL1	Q9H0U9	0.00892221	1.6501	Up
COPRS	Q9NQ92	0.0432221	1.6498	Up
BIRC5	O15392	0.00330415	1.6496	Up
ATG101	Q9BSB4	0.0100461	1.6407	Up
AMOTL2	Q9Y2J4	0.030271	1.6242	Up
MTRR	Q9UBK8	0.000122215	1.6215	Up
RNF114	Q9Y508	4.35852e-06	1.6211	Up
RBIS	Q8N0T1	7.49635e-06	1.6202	Up
MARCHF6	O60337	0.00347367	1.6133	Up
FLRT3	Q9NZU0	0.000366349	1.6109	Up
TTF2	Q9UNY4	0.00197696	1.6049	Up
TYMS	P04818	6.19291e-05	1.5926	Up
MAEA	Q7L5Y9	9.73453e-05	1.5923	Up
CSRP1	P21291	2.92647e-06	1.5904	Up
WEE1	P30291	0.0241048	1.5875	Up
FBXO30	Q8TB52	7.99723e-05	1.5862	Up
ADO	Q96SZ5	1.40994e-05	1.5842	Up
UBE2T	Q9NPD8	0.000475102	1.5824	Up
PDLIM5	Q96HC4	1.85592e-06	1.5798	Up
MCL1	Q07820	0.0031331	1.5798	Up
KIF20B	Q96Q89	0.000336538	1.5749	Up
CCND1	P24385	0.0430666	1.5736	Up
ZNF574	Q6ZN55	0.00191651	1.5704	Up
RRM2	P31350	2.72311e-06	1.5703	Up
RELA	Q04206	0.0152082	1.5657	Up
CKAP2	Q8WWK9	0.00137017	1.5601	Up
NAGLU	P54802	0.00962233	1.5598	Up
RBPMS	Q93062	6.58169e-07	1.5572	Up
ATF6	O00267	0.0463515	1.5507	Up
CAVIN1	Q6NZI2	0.00118648	1.5469	Up
ECT2	Q9H8V3	0.000577423	1.5458	Up
EIF1AD	Q8N9N8	0.00964064	1.5435	Up
KIF20A	O95235	2.24587e-07	1.5432	Up
SQLE	Q14534	6.81084e-05	1.5429	Up
DUS3L	Q96G46	0.00015404	1.5411	Up
SPAG7	O75391	0.000110177	1.539	Up
MOCS3	O95396	0.00102593	1.5389	Up
GATD1	Q8NB37	0.00119477	1.5365	Up
AEBP2	Q6ZN18	0.000508916	1.5362	Up
CDCA8	Q53HL2	0.000356818	1.5359	Up
CRIPT	Q9P021	0.00399583	1.5356	Up
CCNA2	P20248	3.68228e-05	1.5287	Up
MCM8	Q9UJA3	7.45715e-05	1.5262	Up
TAGLN	Q01995	0.000174447	1.524	Up
TRIP6	Q15654	7.15254e-06	1.5222	Up
ALAS1	P13196	0.00136094	1.5209	Up
TNFAIP1	Q6IQ49	0.0497344	1.5206	Up
BTF3	P20290	6.01509e-05	1.5176	Up
NUSAP1	Q9BXS6	0.000367354	1.515	Up
FAIM	Q9NVQ4	0.000509577	1.515	Up
GID8	Q9NWU2	3.32529e-06	1.5084	Up
RNASEH1	O60930	0.00647881	1.5069	Up
MTMR2	Q13614	3.47037e-06	1.506	Up
HK2	P52789	1.16396e-05	1.5049	Up
FBXO11	Q86XK2	0.000533748	1.5034	Up
DYNLT1	P63172	3.21062e-05	1.5025	Up
HAUS1	Q96CS2	0.000411636	1.4965	No-diff
QSER1	Q2KHR3	0.00132025	1.4951	No-diff
PDLIM2	Q96JY6	0.00274285	1.4937	No-diff
C1orf198	Q9H425	0.000459759	1.4935	No-diff
PDLIM7	Q9NR12	4.94086e-05	1.4897	No-diff
RTF2	Q9BY42	2.65012e-05	1.4871	No-diff
CDCA5	Q96FF9	0.00029968	1.4862	No-diff
PITX1	P78337	0.000112312	1.486	No-diff
YRDC	Q86U90	0.00989757	1.4859	No-diff
KDELR1	P24390	0.00181372	1.4856	No-diff
CNN2	Q99439	2.01807e-05	1.4849	No-diff
BCAR1	P56945	4.70971e-05	1.4848	No-diff
PEA15	Q15121	2.96713e-05	1.4837	No-diff
TXNDC15	Q96J42	1.2214e-05	1.4817	No-diff
ZNF106	Q9H2Y7	0.0149988	1.4795	No-diff
USP22	Q9UPT9	1.45599e-05	1.4784	No-diff
AMMECR1	Q9Y4X0	0.00149766	1.4767	No-diff
MAT2A	P31153	6.15534e-05	1.4765	No-diff
KIFC1	Q9BW19	1.83981e-06	1.476	No-diff
WDR6	Q9NNW5	7.49961e-05	1.475	No-diff
POLR3C	Q9BUI4	9.48378e-05	1.4681	No-diff
ECD	O95905	0.0002756	1.4668	No-diff
CDK4	P11802	3.6136e-06	1.4666	No-diff
PDCL3	Q9H2J4	0.00021322	1.4663	No-diff
TPT1	P13693	2.62245e-06	1.4646	No-diff
TOM1L2	Q6ZVM7	0.00114369	1.4633	No-diff
CALCOCO2	Q13137	0.00122013	1.4619	No-diff
UBE2J1	Q9Y385	0.00930005	1.4584	No-diff
XPA	P23025	0.00587693	1.4579	No-diff
FHL3	Q13643	0.0303846	1.4569	No-diff
ZYX	Q15942	4.49348e-06	1.4512	No-diff
CFAP36	Q96G28	0.00355374	1.4506	No-diff
IL18	Q14116	0.00128628	1.4475	No-diff
ACBD6	Q9BR61	1.5108e-06	1.4471	No-diff
PRMT7	Q9NVM4	0.0142333	1.4446	No-diff
EIF1B	O60739	0.000487695	1.4438	No-diff
UBE4B	O95155	0.00389751	1.4413	No-diff
SH2D4A	Q9H788	0.00163616	1.4407	No-diff
AURKB	Q96GD4	2.2443e-05	1.4401	No-diff
PRKAR1A	P10644	0.00449164	1.4352	No-diff
SPAG5	Q96R06	1.04485e-05	1.4346	No-diff
MAML1	Q92585	0.0123779	1.4339	No-diff
LIMS1	P48059	0.00050497	1.4332	No-diff
SKP2	Q13309	0.000193281	1.433	No-diff
MOCS2	O96007	0.0181686	1.4317	No-diff
SETDB1	Q15047	0.000337795	1.4301	No-diff
NRBP1	Q9UHY1	7.38934e-07	1.424	No-diff
TP53I3	Q53FA7	0.000104894	1.4238	No-diff
NUDT15	Q9NV35	0.000748287	1.4233	No-diff
PPP1R11	O60927	0.0130005	1.4231	No-diff
CUL7	Q14999	0.0242931	1.4228	No-diff
UBAP1	Q9NZ09	0.0341981	1.4212	No-diff
EDRF1	Q3B7T1	6.99419e-05	1.421	No-diff
CENATAC	Q86UT8	2.51685e-05	1.4209	No-diff
MACC1	Q6ZN28	8.50227e-06	1.4204	No-diff
CRIM1	Q9NZV1	0.034836	1.4175	No-diff
MZT2B	Q6NZ67	0.000540523	1.417	No-diff
RAD51C	O43502	1.27573e-05	1.4166	No-diff
CASP7	P55210	0.00326209	1.4147	No-diff
CCDC50	Q8IVM0	0.0110499	1.4147	No-diff
MYO1E	Q12965	0.00356293	1.4133	No-diff
PTPN14	Q15678	0.0173401	1.4106	No-diff
UBAP2	Q5T6F2	0.00159081	1.4097	No-diff
ANXA1	P04083	2.33855e-05	1.4093	No-diff
INCENP	Q9NQS7	0.00233929	1.4073	No-diff
CLIP1	P30622	7.26943e-05	1.4069	No-diff
GPC1	P35052	0.00161195	1.4069	No-diff
KIF11	P52732	1.46329e-05	1.4056	No-diff
PHLDB2	Q86SQ0	0.000362755	1.4047	No-diff
RHOB	P62745	0.0437196	1.4042	No-diff
EIF4ENIF1	Q9NRA8	0.00387957	1.404	No-diff
CDCA2	Q69YH5	0.000145842	1.4025	No-diff
RAD51AP1	Q96B01	0.0339794	1.4013	No-diff
L1CAM	P32004	9.34045e-07	1.4012	No-diff
PEX5	P50542	5.27052e-05	1.3982	No-diff
URGCP	Q8TCY9	0.0077987	1.3961	No-diff
VPS4A	Q9UN37	0.00128498	1.3955	No-diff
TUFT1	Q9NNX1	0.0030016	1.3949	No-diff
ASF1B	Q9NVP2	0.0325888	1.3949	No-diff
RABGGTB	P53611	0.000544898	1.394	No-diff
SH3BGRL2	Q9UJC5	0.000278196	1.3915	No-diff
KIF15	Q9NS87	0.00611422	1.3913	No-diff
FOXRED2	Q8IWF2	6.66662e-05	1.3882	No-diff
TWSG1	Q9GZX9	7.13768e-05	1.3882	No-diff
TXLNA	P40222	2.83213e-05	1.3855	No-diff
THBS1	P07996	0.000239928	1.3854	No-diff
COBLL1	Q53SF7	0.0344256	1.3847	No-diff
TUBB3	Q13509	0.0123867	1.3845	No-diff
C12orf45	Q8N5I9	0.000444184	1.3844	No-diff
CENPF	P49454	0.00036936	1.3832	No-diff
IKBKG	Q9Y6K9	0.000618074	1.3829	No-diff
CCDC85C	A6NKD9	0.0013601	1.3814	No-diff
DNAJA1	P31689	1.45494e-05	1.3799	No-diff
CBLC	Q9ULV8	0.00993647	1.3797	No-diff
DNAJC21	Q5F1R6	0.0201874	1.3792	No-diff
GEMIN6	Q8WXD5	0.00939046	1.3787	No-diff
CGAS	Q8N884	0.00150066	1.3783	No-diff
CHEK1	O14757	0.000163952	1.3779	No-diff
KEAP1	Q14145	3.65025e-05	1.3778	No-diff
DLGAP5	Q15398	3.64761e-06	1.3775	No-diff
DOHH	Q9BU89	7.26641e-06	1.3766	No-diff
CRYBG2	Q8N1P7	6.90009e-05	1.3751	No-diff
HSPB1	P04792	0.000160294	1.375	No-diff
WRAP73	Q9P2S5	0.0229717	1.3749	No-diff
TPX2	Q9ULW0	5.50134e-07	1.3746	No-diff
EIF1	P41567	1.02062e-05	1.3732	No-diff
SLAIN2	Q9P270	0.00451131	1.3731	No-diff
MFGE8	Q08431	6.007e-05	1.3724	No-diff
DLG3	Q92796	0.000251536	1.3711	No-diff
R3HDM1	Q15032	0.00334463	1.3702	No-diff
KIF23	Q02241	1.45295e-05	1.3697	No-diff
HIRIP3	Q9BW71	0.0443016	1.3682	No-diff
IQGAP3	Q86VI3	0.000696745	1.368	No-diff
AMFR	Q9UKV5	0.000214174	1.3679	No-diff
NFKB2	Q00653	0.0023853	1.3677	No-diff
ZC3H7A	Q8IWR0	2.83821e-05	1.3652	No-diff
TENM3	Q9P273	0.00575923	1.3646	No-diff
LAMB3	Q13751	0.00281526	1.3645	No-diff
NUCKS1	Q9H1E3	0.000510345	1.364	No-diff
CYFIP2	Q13829	0.0497669	1.3637	No-diff
CCDC43	Q96MW1	0.000558774	1.3631	No-diff
TPM1	P09493	0.00071233	1.363	No-diff
ALKBH7	Q9BT30	0.0147804	1.3622	No-diff
RANBP9	Q96S59	0.000627131	1.3619	No-diff
CIAO1	O76071	5.88292e-05	1.3614	No-diff
EEF2	P13639	4.51643e-06	1.3606	No-diff
CDK2	P24941	0.000586159	1.3599	No-diff
RNF25	Q96BH1	5.18169e-05	1.3593	No-diff
TSEN34	Q9BSV6	0.00105548	1.3579	No-diff
DPH1	Q9BZG8	0.00821377	1.3574	No-diff
RWDD4	Q6NW29	0.00106143	1.3566	No-diff
TXNDC9	O14530	0.000467882	1.3545	No-diff
IVNS1ABP	Q9Y6Y0	0.000232551	1.3538	No-diff
ZNF593	O00488	0.00122438	1.3524	No-diff
MAGED1	Q9Y5V3	0.00849625	1.3524	No-diff
USP11	P51784	0.000124759	1.3515	No-diff
TPRKB	Q9Y3C4	0.0010671	1.3514	No-diff
SPDL1	Q96EA4	3.20509e-05	1.3499	No-diff
AP3S2	Q96FX8	0.0473479	1.3468	No-diff
LAMC2	Q13753	0.00442393	1.3464	No-diff
CASP3	P42574	0.00391823	1.3447	No-diff
KIF2C	Q99661	1.85055e-06	1.344	No-diff
LIG1	P18858	0.00069765	1.3435	No-diff
LMCD1	Q9NZU5	0.012812	1.3421	No-diff
MEMO1	Q9Y316	0.000290296	1.3407	No-diff
SRA1	Q9HD15	9.23724e-05	1.3404	No-diff
EXT2	Q93063	0.000588221	1.34	No-diff
TBCC	Q15814	0.0306623	1.3391	No-diff
KNSTRN	Q9Y448	0.00568925	1.3371	No-diff
FLCN	Q8NFG4	0.000547323	1.337	No-diff
RACGAP1	Q9H0H5	1.07149e-05	1.3364	No-diff
TUBB6	Q9BUF5	0.000181685	1.336	No-diff
RAVER2	Q9HCJ3	0.00246543	1.3357	No-diff
PSME3IP1	Q9GZU8	0.000893154	1.3354	No-diff
FBXO7	Q9Y3I1	0.031735	1.335	No-diff
ATG4B	Q9Y4P1	0.0309943	1.3345	No-diff
HDAC6	Q9UBN7	0.000310754	1.3334	No-diff
ALG10B	Q5I7T1	0.00102072	1.3327	No-diff
DPH5	Q9H2P9	0.028621	1.3327	No-diff
CASP2	P42575	0.0372254	1.3323	No-diff
ZNRD2	O60232	0.00011451	1.3321	No-diff
RASAL2	Q9UJF2	0.00255039	1.3321	No-diff
AARSD1	Q9BTE6	7.92427e-05	1.3317	No-diff
TTC4	O95801	0.000959473	1.3315	No-diff
PPP2R5A	Q15172	0.00124197	1.3309	No-diff
PARVA	Q9NVD7	4.05917e-05	1.3297	No-diff
FLII	Q13045	5.61117e-05	1.3293	No-diff
RNF126	Q9BV68	0.004368	1.3287	No-diff
TCAF1	Q9Y4C2	3.53673e-05	1.3277	No-diff
EEF1A1	P68104	3.20338e-05	1.3269	No-diff
ANKRD40	Q6AI12	6.98067e-05	1.3255	No-diff
CALD1	Q05682	1.05084e-05	1.324	No-diff
MAP3K1	Q13233	0.00318522	1.3227	No-diff
ARNT	P27540	0.0206461	1.3226	No-diff
DLGAP4	Q9Y2H0	0.000225174	1.3219	No-diff
LPP	Q93052	0.000445505	1.3214	No-diff
YBX3	P16989	0.00025117	1.3203	No-diff
CSDE1	O75534	4.98124e-06	1.3193	No-diff
VRK2	Q86Y07	0.0038533	1.3193	No-diff
CDV3	Q9UKY7	5.1192e-05	1.3192	No-diff
THG1L	Q9NWX6	0.028066	1.3181	No-diff
TSC22D2	O75157	0.0063624	1.3176	No-diff
SPAG1	Q07617	0.000186145	1.317	No-diff
PGD	P52209	5.08507e-05	1.3169	No-diff
CLNS1A	P54105	0.000528003	1.3167	No-diff
FADD	Q13158	0.0450479	1.3165	No-diff
TOR3A	Q9H497	0.00300982	1.3147	No-diff
DCAF6	Q58WW2	0.0276285	1.3141	No-diff
HAUS7	Q99871	0.0189677	1.3123	No-diff
ZGPAT	Q8N5A5	0.00514853	1.3119	No-diff
SAAL1	Q96ER3	0.00517662	1.3116	No-diff
CDC123	O75794	0.000719854	1.3113	No-diff
MAD2L2	Q9UI95	0.0282624	1.3106	No-diff
NHLRC2	Q8NBF2	0.000566856	1.3098	No-diff
DTX3L	Q8TDB6	0.00174749	1.3083	No-diff
GGNBP2	Q9H3C7	0.0107772	1.3074	No-diff
C5orf22	P08069	0.0487562	1.3073	No-diff
POLR2M	Q6EEV4	0.000810986	1.3049	No-diff
SAPCD2	Q86UD0	0.000992696	1.3037	No-diff
HGH1	Q9BTY7	0.0023371	1.3037	No-diff
KDM2A	Q9Y2K7	0.000377152	1.3029	No-diff
MTMR12	Q9C0I1	0.000800465	1.3028	No-diff
SERPINA1	P01009	0.0188341	1.3019	No-diff
TRIM26	Q12899	0.0102677	1.3006	No-diff
ELOF1	P60002	0.0411321	1.3004	No-diff
WDR4	P57081	0.00495737	1.3001	No-diff
DAB2	P98082	3.86765e-05	1.2995	No-diff
ZNF22	P17026	0.00299109	1.2994	No-diff
MYADM	Q96S97	7.4702e-05	1.299	No-diff
LGALSL	Q3ZCW2	0.00172358	1.2981	No-diff
ADRM1	Q16186	0.00060598	1.2974	No-diff
ZYG11B	Q9C0D3	0.0174318	1.2969	No-diff
CCS	O14618	0.0403796	1.2965	No-diff
CRABP2	P29373	0.000132776	1.2964	No-diff
PXN	P49023	0.0010796	1.2961	No-diff
POMP	Q9Y244	0.000249166	1.2956	No-diff
DUSP12	Q9UNI6	0.00333472	1.2956	No-diff
KIF21A	Q7Z4S6	0.000273471	1.2926	No-diff
WARS1	P23381	2.74214e-05	1.2921	No-diff
ARHGAP12	Q8IWW6	0.0173216	1.2921	No-diff
DYNLT3	P51808	0.000503695	1.2916	No-diff
BCL9L	Q86UU0	0.0371773	1.2916	No-diff
BICD2	Q8TD16	0.000257517	1.2903	No-diff
UBA5	Q9GZZ9	0.00552915	1.2898	No-diff
RIOK2	Q9BVS4	0.000194015	1.2894	No-diff
CNN3	Q15417	1.68936e-07	1.2875	No-diff
CDK1	P06493	6.02501e-05	1.2873	No-diff
TTK	P33981	0.00472916	1.2872	No-diff
JPT1	Q9UK76	1.96493e-05	1.2871	No-diff
STAP2	Q9UGK3	0.000136581	1.2868	No-diff
ORC6	Q9Y5N6	0.00543066	1.2866	No-diff
RABEPK	Q7Z6M1	0.0231338	1.2862	No-diff
TPM4	P67936	3.24111e-07	1.2855	No-diff
SPECC1L	Q69YQ0	4.66762e-05	1.2839	No-diff
PDLIM1	O00151	3.13306e-07	1.2838	No-diff
HMOX1	P09601	0.000607967	1.2838	No-diff
TGFB1	O75817	0.048056	1.2835	No-diff
PFDN4	Q9NQP4	0.000132723	1.2831	No-diff
USP16	Q9Y5T5	0.00311552	1.2822	No-diff
ACTR5	Q9H9F9	0.00388122	1.2822	No-diff
IGBP1	P78318	7.03983e-05	1.2817	No-diff
YY1AP1	Q9H869	0.034343	1.2809	No-diff
ARHGAP29	Q52LW3	0.000424162	1.2805	No-diff
RPS6KA4	O75676	6.57355e-05	1.28	No-diff
HUS1	O60921	0.000295203	1.2798	No-diff
SURF2	Q15527	0.00869616	1.2787	No-diff
MARK3	P27448	0.0333049	1.2781	No-diff
NAP1L1	P55209	0.0011071	1.2778	No-diff
WDR1	O75083	1.27894e-05	1.2774	No-diff
CDK6	Q00534	0.000512675	1.2773	No-diff
ILK	Q13418	9.55179e-05	1.2766	No-diff
GMEB2	Q9UKD1	0.0232003	1.2763	No-diff
EHD4	Q9H223	0.00169054	1.2762	No-diff
HGD	Q93099	0.0293608	1.2762	No-diff
LASP1	Q14847	0.00134644	1.2761	No-diff
TRIM56	Q9BRZ2	0.0106923	1.2757	No-diff
PGM1	P36871	0.0126064	1.2752	No-diff
DHPS	P49366	0.000656189	1.275	No-diff
DDX11	Q96FC9	0.00597056	1.2746	No-diff
RNF214	Q8ND24	0.0355143	1.2746	No-diff
PDCD5	O14737	0.00153519	1.2734	No-diff
PBK	Q96KB5	0.000140025	1.2732	No-diff
PLEKHF2	Q9H8W4	0.014522	1.2715	No-diff
ZC3HAV1L	Q96H79	9.03411e-05	1.2713	No-diff
RNF113A	O15541	0.00329029	1.2704	No-diff
EIF5	P55010	9.67248e-05	1.2694	No-diff
SPECC1	Q5M775	0.00510598	1.2689	No-diff
ARFGAP2	Q8N6H7	0.00820549	1.2687	No-diff
ARL2BP	Q9Y2Y0	0.0283275	1.2685	No-diff
WDR74	Q6RFH5	2.48107e-06	1.2683	No-diff
RPS10	P46783	0.0012423	1.2677	No-diff
SRM	P19623	2.61698e-05	1.2675	No-diff
NUFIP2	Q7Z417	0.000410221	1.2667	No-diff
EEF1G	P26641	0.000133769	1.2664	No-diff
CASTOR2	A6NHX0	0.0396833	1.2664	No-diff
RAD1	O60671	0.0027766	1.2662	No-diff
RIC8A	Q9NPQ8	6.92185e-06	1.2659	No-diff
CD320	Q9NPF0	0.0176958	1.2654	No-diff
ARMC8	Q8IUR7	4.80814e-05	1.2648	No-diff
CBFB	Q13951	0.00982428	1.2648	No-diff
FERMT2	Q96AC1	0.000798295	1.2629	No-diff
ARHGAP5	Q13017	0.00042945	1.2617	No-diff
FLNA	P21333	1.6141e-05	1.2605	No-diff
DCTD	P32321	0.00304265	1.2602	No-diff
BAG4	O95429	0.00489123	1.2594	No-diff
GPN3	Q9UHW5	0.000848015	1.2587	No-diff
TOP2A	P11388	9.51104e-05	1.2574	No-diff
GABARAPL2	P60520	0.00348818	1.2559	No-diff
FERMT1	Q9BQL6	0.0031052	1.2556	No-diff
F8A1	P23610	0.00433311	1.255	No-diff
PKN1	Q16512	0.00388963	1.2549	No-diff
POLR1A	O95602	0.000232898	1.2542	No-diff
TNS3	Q68CZ2	8.71923e-05	1.2537	No-diff
TIPIN	Q9BVW5	0.00106018	1.2536	No-diff
ATG7	O95352	0.0221451	1.2527	No-diff
AACS	Q86V21	0.0151146	1.2523	No-diff
ZNHIT6	Q9NWK9	0.0006904	1.2522	No-diff
NAE1	Q13564	0.00017506	1.2519	No-diff
FGFR4	P22455	0.0196425	1.2516	No-diff
PREP	P48147	6.39589e-06	1.2512	No-diff
PAPOLG	Q9BWT3	0.00853723	1.2508	No-diff
ACOT7	O00154	0.00209712	1.2502	No-diff
AAK1	Q2M2I8	0.00689698	1.2501	No-diff
SH3BGRL3	Q9H299	0.000112898	1.2497	No-diff
RPS15	P62841	0.00803805	1.2494	No-diff
PSMA4	P25789	3.38771e-05	1.2484	No-diff
NAGK	Q9UJ70	0.000943937	1.2484	No-diff
PRMT3	O60678	0.000117499	1.2479	No-diff
GCC1	Q96CN9	0.0113925	1.2479	No-diff
RPS14	P62263	6.75241e-05	1.2478	No-diff
GFUS	Q13630	0.00156247	1.2477	No-diff
UBAP2L	Q14157	0.00151779	1.2473	No-diff
NSFL1C	Q9UNZ2	7.86332e-05	1.2469	No-diff
RACK1	P63244	0.000670497	1.2469	No-diff
PIR	O00625	0.0053566	1.2461	No-diff
FOXP4	Q8IVH2	0.0304812	1.2461	No-diff
LANCL2	Q9NS86	0.00926307	1.246	No-diff
PAGR1	Q9BTK6	0.00891777	1.2457	No-diff
ANXA3	P12429	2.34918e-05	1.2455	No-diff
VCPIP1	Q96JH7	0.03309	1.2445	No-diff
CETN3	O15182	0.00473041	1.2436	No-diff
MORF4L1	Q9UBU8	4.4159e-05	1.2426	No-diff
VPS25	Q9BRG1	0.00172717	1.2423	No-diff
FKBP1A	P62942	5.85195e-05	1.2421	No-diff
DERA	Q9Y315	7.41346e-05	1.2421	No-diff
CUSTOS	Q96C57	0.00578434	1.2418	No-diff
IGF2	P01344	0.000725512	1.2414	No-diff
MTPN	P58546	0.000595075	1.2408	No-diff
OGFOD1	Q8N543	0.000510715	1.2388	No-diff
SLC4A1AP	Q9BWU0	0.00410629	1.2388	No-diff
EIF4B	P23588	0.00146326	1.2385	No-diff
IMPDH2	P12268	0.00036755	1.238	No-diff
RPS7	P62081	0.00691776	1.2371	No-diff
CLUH	O75153	1.44464e-05	1.2366	No-diff
NOSIP	Q9Y314	0.000246317	1.2366	No-diff
PERP	Q96EV2	0.0472634	1.2353	No-diff
MRTFB	Q9ULH7	5.90956e-05	1.2351	No-diff
PSMG4	Q5JS54	0.00110592	1.2348	No-diff
MAPK13	O15264	0.0138831	1.2348	No-diff
FNTB	P49356	0.00879525	1.2346	No-diff
RPS27	P42677	0.000277269	1.2345	No-diff
ZNF787	Q6DD87	4.63559e-05	1.2339	No-diff
SNX3	O60493	8.87034e-05	1.2332	No-diff
RAI14	Q9P0K7	0.0055063	1.2331	No-diff
KLC2	Q9H0B6	0.00496748	1.2327	No-diff
FLNC	Q14315	1.17924e-06	1.2324	No-diff
FBXO28	Q9NVF7	0.00500512	1.2323	No-diff
TLK1	Q9UKI8	0.00897457	1.2321	No-diff
TELO2	Q9Y4R8	0.000934198	1.232	No-diff
EIF3M	Q7L2H7	9.8293e-05	1.2319	No-diff
RPS21	P63220	0.00398596	1.2315	No-diff
PSMD9	O00233	0.00340066	1.2314	No-diff
COMMD9	Q9P000	0.00481296	1.2312	No-diff
PHACTR2	Q9BV79	0.0488976	1.2312	No-diff
COTL1	Q14019	0.000429108	1.2311	No-diff
ADSL	P30566	0.00123367	1.2309	No-diff
DNMT1	P26358	7.23574e-05	1.2307	No-diff
CHORDC1	Q9UHD1	3.44136e-07	1.2294	No-diff
ADSS2	P30520	1.13614e-06	1.2287	No-diff
CRTAP	O75718	0.00186414	1.2284	No-diff
MANEAL	Q5VSG8	0.00290969	1.2284	No-diff
SRXN1	Q9BYN0	0.00031836	1.2282	No-diff
CDKN2AIPNL	Q96HQ2	0.00282572	1.2276	No-diff
TRAPPC2L	Q9UL33	0.0104314	1.2276	No-diff
SMN1	Q16637	0.000682556	1.2267	No-diff
BMP2K	Q9NSY1	0.027463	1.2264	No-diff
RNF31	Q96EP0	0.0312321	1.2264	No-diff
ACTB	P60709	0.0158682	1.2261	No-diff
CCDC6	Q16204	9.29073e-06	1.226	No-diff
CBX3	Q13185	0.000174585	1.226	No-diff
SNAP29	O95721	0.00219542	1.2259	No-diff
TPM3	P06753	0.000359096	1.2258	No-diff
LRP2	P98164	2.49195e-05	1.2254	No-diff
RNF20	Q5VTR2	0.000523127	1.2253	No-diff
DYNC1I2	Q13409	0.000628309	1.2253	No-diff
CZIB	Q9NWV4	0.00906865	1.2253	No-diff
ETNK1	Q9HBU6	0.000789314	1.2247	No-diff
AKAP2	Q9Y2D5	0.000628646	1.2246	No-diff
ZMYM1	Q5SVZ6	0.039598	1.2246	No-diff
ATF7IP	Q6VMQ6	0.00513371	1.2235	No-diff
RPS23	P62266	0.00107499	1.2233	No-diff
RBM23	P11169	0.0470124	1.2232	No-diff
FBXW11	Q9UKB1	0.000137276	1.2231	No-diff
PHACTR4	Q8IZ21	0.00567348	1.2229	No-diff
VASP	P50552	0.000139912	1.2218	No-diff
DUT	P33316	9.62297e-06	1.2214	No-diff
FAM32A	Q9Y421	0.0304326	1.221	No-diff
DDC	P20711	0.0137953	1.2205	No-diff
GINS4	Q9BRT9	0.00391699	1.2204	No-diff
EIF6	P56537	0.00192966	1.2199	No-diff
NCDN	Q9UBB6	0.000811969	1.2196	No-diff
SUGP1	Q8IWZ8	0.0011724	1.2195	No-diff
MTMR6	Q9Y217	0.00365165	1.2195	No-diff
PIN1	Q13526	0.00133349	1.2194	No-diff
BRD8	Q9H0E9	0.00323358	1.2192	No-diff
CREBBP	Q92793	0.000581591	1.219	No-diff
ITCH	Q96J02	6.21832e-05	1.2186	No-diff
PEG10	Q86TG7	0.00108234	1.2185	No-diff
CHMP3	Q9Y3E7	0.00732699	1.2178	No-diff
NAA50	Q9GZZ1	6.80212e-05	1.2176	No-diff
GINS1	Q14691	0.000892742	1.2174	No-diff
DUSP3	P51452	0.00201991	1.2167	No-diff
TXNL1	O43396	0.000779142	1.2165	No-diff
GSTO1	P78417	0.00087123	1.2165	No-diff
CYP51A1	Q16850	8.61673e-05	1.2147	No-diff
CGGBP1	Q9UFW8	0.00193053	1.2146	No-diff
ZPR1	O75312	3.39256e-05	1.2145	No-diff
HNF1A	P20823	0.00110498	1.2136	No-diff
TMEM51	Q9NW97	0.0179706	1.2136	No-diff
ENSA	O43768	0.00019718	1.2133	No-diff
NME2	P22392	1.33492e-05	1.2132	No-diff
PHF14	O94880	0.00179057	1.2127	No-diff
ZNF281	Q9Y2X9	0.00466534	1.2127	No-diff
RPS15A	P62244	0.0169034	1.2122	No-diff
AHCY	P23526	0.000421438	1.2121	No-diff
OPLAH	O14841	0.00984328	1.2113	No-diff
RIOK1	Q9BRS2	8.60667e-05	1.2112	No-diff
EHD1	Q9H4M9	0.000645446	1.2103	No-diff
MRI1	Q9BV20	0.00171105	1.2102	No-diff
S100A11	P31949	0.0145627	1.2095	No-diff
ZFYVE16	Q7Z3T8	0.0286772	1.2095	No-diff
PIAS4	Q8N2W9	0.0215939	1.2093	No-diff
TP53RK	Q96S44	0.000193357	1.209	No-diff
THOP1	P52888	0.000789778	1.2085	No-diff
THAP11	Q96EK4	0.00539282	1.2077	No-diff
MYG1	Q9HB07	0.000339263	1.2075	No-diff
CIP2A	Q8TCG1	0.0070151	1.2075	No-diff
USP8	P40818	0.012335	1.2074	No-diff
PPP4R2	Q9NY27	0.00246906	1.2073	No-diff
EIF4H	Q15056	0.00817538	1.2072	No-diff
PPA1	Q15181	7.08046e-06	1.2071	No-diff
TSC2	P49815	0.0184511	1.207	No-diff
ADAM9	Q13443	0.0014874	1.2069	No-diff
HSBP1	O75506	0.0151192	1.2068	No-diff
CFL2	Q9Y281	0.00012277	1.2067	No-diff
GATA6	Q92908	0.000185303	1.2067	No-diff
BAIAP2L1	Q9UHR4	0.000581207	1.2067	No-diff
POLE2	P56282	0.0187896	1.2064	No-diff
CSTB	P04080	0.000539393	1.2063	No-diff
DNAJC9	Q8WXX5	0.00394914	1.2062	No-diff
ATP6AP2	O75787	0.0058097	1.2062	No-diff
ESRP2	Q9H6T0	0.00998164	1.2062	No-diff
HIKESHI	Q53FT3	0.000383556	1.206	No-diff
YAP1	P46937	0.00197752	1.2055	No-diff
DCAF7	P61962	0.000347916	1.2052	No-diff
GNL3L	Q9NVN8	0.00120127	1.2052	No-diff
DIS3L2	Q8IYB7	0.0298274	1.2052	No-diff
MAP3K20	P09884	0.0476004	1.2052	No-diff
NEK6	Q9HC98	0.000663112	1.2051	No-diff
DCTN4	Q9UJW0	0.00599705	1.205	No-diff
EIF3G	O75821	0.00166348	1.2048	No-diff
C9orf64	Q5T6V5	0.0292834	1.2045	No-diff
MAPRE1	Q15691	9.96763e-06	1.2044	No-diff
PAK6	Q9NQU5	0.00347726	1.2044	No-diff
PHKA2	P46019	0.0220146	1.2043	No-diff
CTPS1	P17812	1.28639e-05	1.2041	No-diff
TAGLN2	P37802	0.0252927	1.2039	No-diff
PPP4R1	Q8TF05	0.00328787	1.2035	No-diff
MYL6	P60660	1.33559e-05	1.2032	No-diff
UBE2H	P62256	0.0143313	1.2025	No-diff
N4BP2	Q86UW6	0.0205252	1.2024	No-diff
RRP36	Q96EU6	0.0394109	1.2024	No-diff
YJU2	Q9BW85	0.00771411	1.2022	No-diff
PANK2	Q9BZ23	0.035348	1.2018	No-diff
EEFSEC	P57772	0.00149524	1.2017	No-diff
CARHSP1	Q9Y2V2	0.019268	1.2014	No-diff
USP15	Q9Y4E8	0.0159473	1.2012	No-diff
UBR2	Q8IWV8	0.00492858	1.201	No-diff
GRWD1	Q9BQ67	0.00566592	1.2008	No-diff
TRIR	Q9BQ61	0.0337397	1.2006	No-diff
CAPRIN1	Q14444	0.000560991	1.2004	No-diff
NUTF2	P61970	0.000166531	1.2003	No-diff
RBM5	P52756	0.000205556	1.2003	No-diff
UBE2A	P49459	0.00918743	1.2	No-diff
HSPH1	Q92598	5.12963e-07	1.1999	No-diff
RPL31	P62899	0.0133466	1.1999	No-diff
HINT1	P49773	0.000658702	1.1995	No-diff
TTC27	Q6P3X3	0.00432529	1.1991	No-diff
CNDP2	Q96KP4	2.8391e-05	1.199	No-diff
YBX1	P67809	1.90674e-05	1.1989	No-diff
STAMBP	O95630	0.00106673	1.1987	No-diff
NRP2	O60462	0.0241357	1.1986	No-diff
IDI1	Q13907	0.0196694	1.1984	No-diff
EIF2B2	P49770	0.000117678	1.1982	No-diff
BUD31	P41223	0.00450525	1.198	No-diff
ETF1	P62495	0.000190389	1.1979	No-diff
SETD3	Q86TU7	0.00424067	1.1979	No-diff
RPL21	P46778	0.00629396	1.1977	No-diff
USH1C	Q9Y6N9	0.00233058	1.1976	No-diff
ENOPH1	Q9UHY7	0.000591845	1.1973	No-diff
MYH9	P35579	1.71027e-05	1.1971	No-diff
RPTOR	Q8N122	0.0021272	1.1971	No-diff
PSMB1	P20618	2.81108e-05	1.197	No-diff
METTL5	Q9NRN9	0.0340522	1.1967	No-diff
CD151	P48509	0.0432771	1.1965	No-diff
LARP4	Q71RC2	0.0166321	1.1964	No-diff
NAA30	Q147X3	0.0378556	1.196	No-diff
CAPNS1	P04632	0.0166711	1.195	No-diff
PAAF1	Q9BRP4	0.000403289	1.1949	No-diff
OLA1	Q9NTK5	0.00170494	1.1947	No-diff
CPNE3	O75131	0.00161791	1.1946	No-diff
VCL	P18206	0.00223128	1.1936	No-diff
EEF1AKNMT	Q8N6R0	0.000153741	1.1932	No-diff
SHPK	Q9UHJ6	0.00200064	1.1931	No-diff
PREPL	Q4J6C6	0.0278687	1.1931	No-diff
STRN4	Q9NRL3	0.0157583	1.1929	No-diff
DSCC1	Q9BVC3	0.00811359	1.1928	No-diff
PAFAH1B1	P43034	0.000122724	1.1927	No-diff
STRAP	Q9Y3F4	0.00185415	1.1924	No-diff
ASS1	P00966	0.000280709	1.192	No-diff
TUBB2B	Q9BVA1	4.55742e-05	1.1919	No-diff
CDC45	O75419	0.0120389	1.1917	No-diff
BAIAP2	Q9UQB8	1.41376e-05	1.1916	No-diff
METTL1	Q9UBP6	0.00214515	1.1916	No-diff
RPS3A	P61247	0.000397724	1.1913	No-diff
PRPSAP1	Q14558	0.00184987	1.1912	No-diff
GCLM	P48507	0.0259525	1.191	No-diff
GORASP2	Q9H8Y8	0.00213892	1.1909	No-diff
METTL2B	Q6P1Q9	0.0299012	1.1909	No-diff
NRDC	O43847	1.7739e-05	1.1904	No-diff
GDI2	P50395	0.0001621	1.1901	No-diff
TXLNG	Q9NUQ3	6.14022e-06	1.1898	No-diff
SKP1	P63208	1.42918e-05	1.1895	No-diff
PSMD11	O00231	0.000528469	1.1894	No-diff
ADH5	P11766	0.000729233	1.1893	No-diff
VAV2	P52735	0.00787065	1.1889	No-diff
WDR13	Q9H1Z4	0.0428123	1.1889	No-diff
GPHN	Q9NQX3	0.0266505	1.1888	No-diff
ABCF2	Q9UG63	0.000474787	1.1886	No-diff
CIAPIN1	Q6FI81	0.0016305	1.1883	No-diff
EIF3F	O00303	0.0116494	1.1882	No-diff
AKT2	P31751	0.00234852	1.1881	No-diff
NDE1	Q9Y3B2	0.0490783	1.1879	No-diff
RBM3	P98179	0.002156	1.1875	No-diff
LUZP1	Q86V48	0.000888748	1.1873	No-diff
APOBEC3B	Q9UH17	7.69821e-05	1.1858	No-diff
TTC1	Q99614	0.000487191	1.1857	No-diff
ADK	P55263	0.00469534	1.1857	No-diff
MAZ	P56270	0.000245244	1.1853	No-diff
AASDHPPT	Q9NRN7	2.14279e-05	1.1851	No-diff
BSDC1	Q9NW68	0.0413381	1.1848	No-diff
SUGT1	Q9Y2Z0	0.000881374	1.1847	No-diff
PBDC1	Q9BVG4	2.20917e-05	1.1846	No-diff
WDR45B	Q5MNZ6	0.0163661	1.1846	No-diff
ATOX1	O00244	0.00127895	1.1845	No-diff
PFAS	O15067	0.000125998	1.1843	No-diff
ZC3H15	Q8WU90	1.93401e-05	1.1842	No-diff
ACLY	P53396	1.01002e-05	1.1841	No-diff
CDC27	P30260	0.0076607	1.184	No-diff
NT5DC1	Q5TFE4	0.000196163	1.1834	No-diff
SGTA	O43765	0.000170038	1.1832	No-diff
PYGB	P11216	0.00039559	1.1832	No-diff
POLR1D	P0DPB6	0.00456525	1.183	No-diff
ANKRD17	O75179	0.00570761	1.183	No-diff
ZNF451	Q9Y4E5	0.0336629	1.1827	No-diff
TUBGCP3	Q96CW5	0.000111299	1.1825	No-diff
MED15	Q96RN5	0.000838146	1.1825	No-diff
EIF4G1	Q04637	2.21417e-05	1.1823	No-diff
WDR70	Q9NW82	1.3339e-05	1.182	No-diff
LRIF1	Q5T3J3	0.000380126	1.182	No-diff
SERPINB1	P30740	0.000642423	1.1818	No-diff
IPO4	Q8TEX9	8.93715e-05	1.1815	No-diff
NUDT4B	A0A024RBG1	0.0128037	1.1814	No-diff
GSTP1	P09211	0.000629314	1.1809	No-diff
FSCN1	Q16658	4.65814e-05	1.1808	No-diff
KPNA2	P52292	0.00145977	1.1807	No-diff
TRIM32	Q13049	0.00149379	1.1807	No-diff
UEVLD	Q8IX04	0.00309988	1.1807	No-diff
TMEM106C	Q9BVX2	0.000250263	1.1806	No-diff
PGGT1B	P53609	0.0334756	1.1805	No-diff
TTI1	O43156	0.0013178	1.1801	No-diff
DBNL	Q9UJU6	1.29303e-06	1.1799	No-diff
GTF2B	Q00403	0.00279831	1.1797	No-diff
AGFG1	P52594	0.000593262	1.1794	No-diff
DST	Q03001	0.00181778	1.1794	No-diff
ING5	Q8WYH8	5.05003e-05	1.179	No-diff
NACC1	Q96RE7	0.00136264	1.179	No-diff
RBM19	Q9Y4C8	0.000189804	1.1788	No-diff
DCTPP1	Q9H773	0.00780846	1.1787	No-diff
BRAP	Q7Z569	0.0209251	1.1784	No-diff
KLC1	Q07866	0.00132739	1.1783	No-diff
RPS12	P25398	0.000727796	1.1781	No-diff
EIF2A	Q9BY44	0.000180723	1.1779	No-diff
BUB3	O43684	0.000173392	1.1778	No-diff
BICC1	Q9H694	0.002152	1.1776	No-diff
PPP2CA	P67775	0.000449339	1.1774	No-diff
POLR1C	O15160	0.000305541	1.1767	No-diff
ARPC1A	Q92747	4.88454e-06	1.1764	No-diff
NME1	P15531	4.77453e-05	1.1761	No-diff
DNAJC7	Q99615	0.00449632	1.1755	No-diff
CKAP5	Q14008	0.00398354	1.1754	No-diff
ARPC5	O15511	0.0102864	1.1752	No-diff
ARHGDIA	P52565	4.44598e-05	1.1748	No-diff
BRK1	Q8WUW1	0.0343139	1.1742	No-diff
ISYNA1	Q9NPH2	0.00127028	1.1738	No-diff
PCBP2	Q15366	0.00183471	1.1738	No-diff
PUS7L	Q9H0K6	0.00273954	1.1737	No-diff
SMARCAD1	Q9H4L7	0.00686463	1.1737	No-diff
RPS2	P15880	0.00154175	1.1734	No-diff
PAWR	Q96IZ0	4.69153e-06	1.1731	No-diff
PCBD1	P61457	0.0137384	1.1725	No-diff
GIGYF2	Q6Y7W6	0.00167639	1.1723	No-diff
DNAJC2	Q99543	8.7657e-05	1.172	No-diff
RPE	Q96AT9	0.00169228	1.1713	No-diff
EGFR	P00533	0.000142107	1.171	No-diff
KIF22	Q14807	0.000225473	1.1702	No-diff
ST13	P50502	0.00149202	1.17	No-diff
C15orf40	Q8WUR7	0.0243274	1.1699	No-diff
FPGS	Q05932	0.00390303	1.1695	No-diff
POLR2D	O15514	0.00033131	1.1687	No-diff
RPS19	P39019	0.000988506	1.1686	No-diff
MICAL3	Q7RTP6	0.00151617	1.1682	No-diff
WDR77	Q9BQA1	0.0169271	1.1681	No-diff
PFDN5	Q99471	6.46659e-05	1.1679	No-diff
ALDH16A1	Q8IZ83	0.00767598	1.1677	No-diff
BUD23	O43709	0.000758789	1.1676	No-diff
DIAPH3	Q9NSV4	0.0146388	1.1676	No-diff
CHST14	Q8NCH0	0.00420678	1.1675	No-diff
RANBP1	P43487	9.45728e-05	1.167	No-diff
AK6	Q9Y3D8	0.00836869	1.1669	No-diff
ARIH1	Q9Y4X5	0.00582232	1.1668	No-diff
NAMPT	P43490	0.000303935	1.1663	No-diff
FNTA	P49354	0.00180966	1.1662	No-diff
PEPD	P12955	0.000318428	1.1659	No-diff
POP7	Q92620	0.0479947	1.1659	No-diff
MARCKSL1	P49006	9.74154e-06	1.1654	No-diff
RPS16	P62249	0.00409196	1.165	No-diff
TRIM28	Q13263	0.000495652	1.1648	No-diff
CIAO2B	Q9Y3D0	0.0298804	1.1648	No-diff
EPS8	Q12929	0.0198939	1.1643	No-diff
HDGF	P51858	7.64924e-06	1.1639	No-diff
GRK6	P43250	0.0050337	1.1638	No-diff
ITGB4	P16144	0.00295598	1.1633	No-diff
TFG	Q92734	0.000829821	1.1631	No-diff
ATIC	P31939	4.18683e-06	1.1629	No-diff
EIF4G2	P78344	0.000477794	1.1629	No-diff
TBCA	O75347	0.0378365	1.1629	No-diff
C12orf29	Q8N999	0.0126621	1.1627	No-diff
UBE2Z	Q9H832	8.66051e-06	1.1626	No-diff
PSMD13	Q9UNM6	0.000783237	1.1623	No-diff
BCL2L1	Q07817	0.00440698	1.162	No-diff
NCKAP1	Q9Y2A7	0.0016734	1.1619	No-diff
RPS20	P60866	0.00289711	1.1619	No-diff
SDC4	P31431	0.0306738	1.1619	No-diff
OSGEP	Q9NPF4	0.000721461	1.1615	No-diff
ANKHD1	Q8IWZ3	0.00112778	1.1615	No-diff
PSMD2	Q13200	7.66859e-05	1.1613	No-diff
TES	Q9UGI8	0.000410005	1.1613	No-diff
SMYD5	Q6GMV2	0.000455471	1.1612	No-diff
CSNK2A2	P19784	0.000634632	1.1612	No-diff
MID1	O15344	0.000659133	1.1612	No-diff
CRK	P46108	0.0169509	1.1608	No-diff
TUBA1C	Q9BQE3	0.00153293	1.1606	No-diff
NCAPD3	P42695	0.00359799	1.1605	No-diff
QRICH1	Q2TAL8	0.00169349	1.1603	No-diff
NAA10	P41227	0.000117275	1.16	No-diff
EIF2B4	Q9UI10	1.98207e-06	1.1599	No-diff
ELAC2	Q9BQ52	0.00141385	1.1599	No-diff
MLST8	Q9BVC4	0.00335823	1.1597	No-diff
G3BP2	Q9UN86	0.00155529	1.1589	No-diff
SUMO2	P61956	0.0106725	1.1589	No-diff
NAPG	Q99747	0.000547087	1.1587	No-diff
EEF1D	P29692	1.62787e-05	1.1586	No-diff
ARHGAP35	Q9NRY4	0.00828412	1.1583	No-diff
PCNP	Q8WW12	0.0210284	1.158	No-diff
CRLF3	Q8IUI8	0.021498	1.158	No-diff
EIF3E	P60228	0.000136824	1.1576	No-diff
PRMT5	O14744	0.000101751	1.1574	No-diff
USP34	Q70CQ2	0.0148918	1.1573	No-diff
NXN	Q6DKJ4	0.00709601	1.157	No-diff
GLMN	Q92990	0.00666458	1.1567	No-diff
AAR2	Q9Y312	0.000865601	1.1565	No-diff
ESD	P10768	0.00287596	1.1565	No-diff
RPL39P5	Q59GN2	4.71917e-05	1.1563	No-diff
TWF1	Q12792	0.000974301	1.1559	No-diff
LZIC	Q8WZA0	0.023424	1.1557	No-diff
RPL37A	P61513	0.0083712	1.1556	No-diff
RUFY1	Q96T51	0.0341091	1.1556	No-diff
PLAA	Q9Y263	0.00190949	1.1551	No-diff
FAM111B	Q6SJ93	0.00644182	1.1548	No-diff
LAMC1	P11047	1.01423e-05	1.1547	No-diff
JPT2	Q9H910	0.0225376	1.1546	No-diff
SMG6	Q86US8	0.0444653	1.1544	No-diff
NEMF	O60524	0.00338893	1.1543	No-diff
PARK7	Q99497	0.000163829	1.154	No-diff
SEPTIN9	Q9UHD8	0.000228191	1.154	No-diff
ZW10	O43264	0.000399998	1.154	No-diff
GCFC2	P16383	0.0247151	1.1537	No-diff
TAB2	Q9NYJ8	0.0244714	1.1536	No-diff
EIF3I	Q13347	7.20301e-05	1.1534	No-diff
PA2G4	Q9UQ80	0.00321173	1.1532	No-diff
ATE1	O95260	0.00222429	1.1531	No-diff
PSME3	P61289	0.00275377	1.1529	No-diff
APLP2	Q06481	0.000167978	1.1527	No-diff
PPP6C	O00743	0.010848	1.1527	No-diff
CHML	P26374	0.0335361	1.1525	No-diff
RALBP1	Q15311	0.00702444	1.1523	No-diff
GPAM	Q9HCL2	0.0340653	1.1523	No-diff
DPYSL3	Q14195	0.000180563	1.1522	No-diff
IPO7	O95373	0.00023405	1.1522	No-diff
DYNLL1	P63167	0.000104726	1.1514	No-diff
MPHOSPH6	Q99547	0.0025949	1.1512	No-diff
RPL8	P62917	0.00124725	1.151	No-diff
STARD7	Q9NQZ5	0.00288911	1.151	No-diff
CSK	P41240	0.00275161	1.1509	No-diff
KANK2	Q63ZY3	0.019971	1.1508	No-diff
MOB4	Q9Y3A3	0.000843108	1.1505	No-diff
RPS17	P08708	0.0148691	1.1505	No-diff
PPP4R3A	Q6IN85	0.0249756	1.1503	No-diff
BOLA2	Q9H3K6	0.0150662	1.1502	No-diff
IPO5	O00410	9.72867e-06	1.1499	No-diff
EIF4A2	Q14240	0.00321877	1.1499	No-diff
CFL1	P23528	0.00468294	1.1499	No-diff
PIP5K1A	Q99755	0.0150192	1.1499	No-diff
PSMC5	P62195	0.000516131	1.1497	No-diff
SERBP1	Q8NC51	0.000672283	1.1497	No-diff
RPS29	P62273	0.00402644	1.1496	No-diff
HMGB3	O15347	0.00589932	1.1494	No-diff
SYAP1	Q96A49	0.000231	1.1493	No-diff
SRP19	P09132	0.0107266	1.1492	No-diff
ELF2	Q15723	0.0434751	1.1487	No-diff
PPP2R5C	Q13362	0.0153028	1.1486	No-diff
XPNPEP1	Q9NQW7	0.0242038	1.1486	No-diff
TTC9C	Q8N5M4	0.00304503	1.1484	No-diff
TIGAR	Q9NQ88	0.019633	1.1484	No-diff
PSMC2	P35998	0.00040271	1.1483	No-diff
MON2	O95168	0.0484925	1.1483	No-diff
CAPN2	P17655	6.14404e-05	1.1481	No-diff
RHPN2	Q8IUC4	0.000706047	1.148	No-diff
PCNA	P12004	0.00361924	1.1479	No-diff
PPFIBP1	Q86W92	0.000260373	1.1478	No-diff
GCHFR	P30047	0.000326504	1.1478	No-diff
ANP32A	P39687	0.000807093	1.1478	No-diff
EFHD2	Q96C19	0.00110775	1.1478	No-diff
RPL24	P83731	0.00178036	1.1477	No-diff
USP47	Q96K76	0.00190513	1.1477	No-diff
AHSA1	O95433	0.0392087	1.1477	No-diff
DGCR8	Q8WYQ5	0.0350957	1.1473	No-diff
CXorf56	Q9H5V9	0.0248577	1.147	No-diff
RPSA	P08865	4.51473e-05	1.1467	No-diff
ZNF598	Q86UK7	0.00480487	1.1467	No-diff
SDE2	Q5VT52	0.0497039	1.1466	No-diff
DPP9	Q86TI2	7.35365e-05	1.1464	No-diff
SULT1A3	P0DMM9	0.00650642	1.1463	No-diff
NPEPPS	P55786	0.000261218	1.1462	No-diff
RPL30	P62888	0.0223021	1.1462	No-diff
CLIC1	O00299	0.00181573	1.1461	No-diff
TARS1	P26639	1.95374e-05	1.146	No-diff
PSMC1	P62191	3.44313e-05	1.1457	No-diff
IMPDH1	P20839	0.000663962	1.1456	No-diff
YWHAZ	P63104	0.00185941	1.1454	No-diff
GSDME	O60443	0.0102236	1.1452	No-diff
ERGIC3	Q9Y282	0.0265287	1.1451	No-diff
ME1	P48163	0.000356216	1.145	No-diff
HMGB1	P09429	0.000110974	1.1447	No-diff
G3BP1	Q13283	0.00144264	1.1446	No-diff
EEF1B2	P24534	0.000753412	1.1445	No-diff
DYNC1LI1	Q9Y6G9	0.000107326	1.1443	No-diff
COBL	O75128	0.000374801	1.1443	No-diff
PRIM2	P49643	0.00111636	1.1442	No-diff
PPP5C	P53041	0.0110692	1.1442	No-diff
UBE2Q1	Q7Z7E8	0.00150632	1.1439	No-diff
RPS18	P62269	0.00399459	1.1435	No-diff
DCAF8	Q5TAQ9	0.0012088	1.1432	No-diff
EZR	P15311	0.000356676	1.143	No-diff
BAG6	P46379	0.000445615	1.1429	No-diff
SHTN1	A0MZ66	0.00206943	1.1426	No-diff
TRMT1	Q9NXH9	0.00208553	1.1426	No-diff
PIK3R4	Q99570	0.00153017	1.1425	No-diff
PRRC2B	Q5JSZ5	0.038228	1.1424	No-diff
SPATS2L	Q9NUQ6	6.21182e-05	1.1422	No-diff
HMCES	Q96FZ2	0.00314649	1.1422	No-diff
COPS3	Q9UNS2	0.000716512	1.1418	No-diff
RAB32	Q13637	0.00509042	1.1417	No-diff
MPZL1	O95297	0.000169856	1.1415	No-diff
UAP1	Q16222	0.0221734	1.1414	No-diff
ZC3HAV1	Q7Z2W4	0.000197687	1.1402	No-diff
HSPBP1	Q9NZL4	0.00357324	1.1402	No-diff
EIF2S3	P41091	0.000237412	1.1397	No-diff
GTF2E2	P29084	0.000700803	1.1397	No-diff
TUBB	P07437	0.0130518	1.1395	No-diff
SCRN1	Q12765	0.00694919	1.1394	No-diff
UGDH	O60701	0.000586834	1.1391	No-diff
PSMD1	Q99460	1.22385e-05	1.139	No-diff
TOP3A	Q13472	0.000338757	1.1388	No-diff
RBM47	A0AV96	0.00173909	1.1388	No-diff
GPS1	Q13098	0.00395635	1.1386	No-diff
EIF4E	P06730	0.0049766	1.1383	No-diff
NCK1	P16333	0.00218599	1.1381	No-diff
FASN	P49327	1.14083e-06	1.138	No-diff
SMAD3	P84022	0.0399515	1.138	No-diff
PDXK	O00764	2.23574e-05	1.1376	No-diff
MAP7	Q14244	0.0325997	1.1376	No-diff
DNAJB1	P25685	0.00862991	1.1375	No-diff
GAPDH	P04406	0.00343335	1.1373	No-diff
DYNC1LI2	O43237	0.000362642	1.1372	No-diff
POLR3D	P05423	0.000729977	1.1371	No-diff
HYPK	Q9NX55	0.0010263	1.1369	No-diff
EIF2D	P41214	0.00104903	1.1369	No-diff
HDDC2	Q7Z4H3	0.000478541	1.1366	No-diff
PSMD4	P55036	0.00713104	1.1365	No-diff
TUBA1B	P68363	0.0124607	1.1365	No-diff
SEC23B	Q15437	0.000165767	1.136	No-diff
RBBP8NL	Q8NC74	0.00238183	1.136	No-diff
SLK	Q9H2G2	0.0385005	1.1359	No-diff
RPL18A	Q02543	0.000953046	1.1358	No-diff
MCFD2	Q8NI22	0.00431335	1.1357	No-diff
RPP25	Q9BUL9	0.0193292	1.1357	No-diff
PGP	A6NDG6	0.00858373	1.1355	No-diff
RNH1	P13489	7.00647e-06	1.1352	No-diff
HSPA14	Q0VDF9	0.0106236	1.1352	No-diff
TKFC	Q3LXA3	0.0245616	1.1352	No-diff
RPS6	P62753	0.021809	1.1351	No-diff
YWHAQ	P27348	0.00222959	1.1349	No-diff
LTV1	Q96GA3	0.0048617	1.1347	No-diff
AGRN	O00468	0.0213576	1.1347	No-diff
PITPNA	Q00169	0.000107561	1.1346	No-diff
RPS26	P62854	0.000956964	1.1341	No-diff
PFN1	P07737	1.13495e-05	1.134	No-diff
SAE1	Q9UBE0	0.000409075	1.1339	No-diff
TECTA	O75443	0.011878	1.1338	No-diff
GRB2	P62993	0.0010502	1.1337	No-diff
FBXO2	Q9UK22	0.000230321	1.1333	No-diff
BCAP29	Q9UKS6	0.0464051	1.1333	No-diff
RPL7A	P62424	0.000140588	1.1332	No-diff
KIF4A	O95239	0.000750014	1.1332	No-diff
SAMHD1	Q9Y3Z3	0.000851749	1.1332	No-diff
SNAPIN	O95295	0.00521156	1.1331	No-diff
OVCA2	Q8WZ82	0.00189786	1.133	No-diff
EIF3B	P55884	0.00117636	1.1327	No-diff
IRGQ	Q8WZA9	0.0316678	1.1325	No-diff
HNF4A	P41235	5.51239e-05	1.1321	No-diff
CHMP4B	Q9H444	0.0269133	1.1321	No-diff
HSP90AB1	P08238	0.00110467	1.1317	No-diff
PABPC1	P11940	0.000880963	1.1316	No-diff
UFC1	Q9Y3C8	0.0116402	1.1316	No-diff
VPS51	Q9UID3	0.00990236	1.1315	No-diff
FKBP4	Q02790	0.0123952	1.1314	No-diff
RPIA	P49247	0.000456764	1.1313	No-diff
CNOT7	Q9UIV1	0.0222469	1.1312	No-diff
PFDN1	O60925	0.0299772	1.1312	No-diff
OGT	O15294	0.000237177	1.1311	No-diff
RGPD5	Q99666	0.0422032	1.1311	No-diff
TKT	P29401	0.000183379	1.131	No-diff
DPP3	Q9NY33	0.000650221	1.1309	No-diff
TOMM34	Q15785	0.000408367	1.1308	No-diff
FZD2	Q14332	0.0111077	1.1308	No-diff
TARBP2	Q15633	0.00999532	1.1306	No-diff
ARID3B	Q8IVW6	0.000936035	1.1305	No-diff
COPS7B	Q9H9Q2	0.00476626	1.1305	No-diff
GOLGA1	Q92805	0.0231215	1.1301	No-diff
LANCL1	O43813	0.000739678	1.1299	No-diff
PHAX	Q9H814	0.000348262	1.1297	No-diff
UNC45A	Q9H3U1	0.00206226	1.1294	No-diff
UBE2V1	Q13404	0.00246069	1.1294	No-diff
ZBED1	O96006	0.0124929	1.1294	No-diff
EIF4A1	P60842	0.000287815	1.129	No-diff
KIFBP	Q96EK5	0.00626489	1.129	No-diff
DHFR	P00374	0.0040525	1.1288	No-diff
SYNRG	Q9UMZ2	0.0049068	1.1287	No-diff
MYOF	Q9NZM1	2.57001e-05	1.1286	No-diff
STAU1	O95793	0.00209157	1.1286	No-diff
PPM1G	O15355	0.00315766	1.1285	No-diff
EHBP1	Q8NDI1	0.00153748	1.1282	No-diff
TTC17	Q96AE7	0.0100912	1.1282	No-diff
MAP3K7	O43318	0.04338	1.1282	No-diff
SSU72	Q9NP77	0.000382135	1.128	No-diff
GTF2F1	P35269	0.0013397	1.128	No-diff
LDHA	P00338	0.00471176	1.1279	No-diff
MYL12A	P19105	0.00985274	1.1276	No-diff
AKR1A1	P14550	0.0010542	1.1274	No-diff
EIF2B5	Q13144	0.000177627	1.1271	No-diff
TOLLIP	Q9H0E2	0.00725824	1.1269	No-diff
PKM	P14618	0.000166476	1.1268	No-diff
RPS11	P62280	0.0302399	1.1266	No-diff
C9orf78	Q9NZ63	0.0164037	1.1262	No-diff
CDK7	P50613	0.0435469	1.1261	No-diff
DDB1	Q16531	0.00037528	1.1252	No-diff
DCTN3	O75935	0.0202911	1.1251	No-diff
WNK1	Q9H4A3	0.00697152	1.125	No-diff
RIPK1	Q13546	0.0100847	1.1249	No-diff
KIAA1522	Q9P206	0.036674	1.1249	No-diff
SARS1	P49591	0.000490851	1.1248	No-diff
DHX35	Q9H5Z1	0.0135515	1.1247	No-diff
ZFP36L2	P47974	0.00534253	1.1246	No-diff
RPLP2	P05387	0.00326467	1.1244	No-diff
METAP2	P50579	0.00493323	1.1244	No-diff
RPS3	P23396	0.0410005	1.1244	No-diff
NUDT5	Q9UKK9	0.000993771	1.1238	No-diff
COMMD10	Q9Y6G5	0.0385437	1.1238	No-diff
LTA4H	P09960	0.000178394	1.1236	No-diff
PSME4	Q14997	0.00508312	1.1235	No-diff
ECPAS	Q5VYK3	0.000164516	1.1234	No-diff
IDE	P14735	0.000499782	1.1232	No-diff
PCM1	Q15154	0.00178251	1.1231	No-diff
KDM3B	Q7LBC6	0.001429	1.123	No-diff
CCT3	P49368	0.000201139	1.1229	No-diff
PYM1	Q9BRP8	0.0113216	1.1229	No-diff
RRM1	P23921	0.000324932	1.1228	No-diff
BZW2	Q9Y6E2	0.00814348	1.1228	No-diff
ARAF	P10398	0.0181292	1.1228	No-diff
GMPS	P49915	8.65831e-05	1.1227	No-diff
CUL1	Q13616	0.00250154	1.1225	No-diff
MCMBP	Q9BTE3	0.000160739	1.1224	No-diff
RANBP3	Q9H6Z4	0.000239174	1.1222	No-diff
KNTC1	P50748	0.0106004	1.1222	No-diff
MCTS1	Q9ULC4	9.29601e-06	1.1221	No-diff
PDCD6IP	Q8WUM4	0.00302522	1.1218	No-diff
XPO4	Q9C0E2	0.00879142	1.1218	No-diff
APP	P05067	0.00013191	1.1216	No-diff
RPL12	P30050	0.00628371	1.1215	No-diff
RTKN	Q9BST9	0.00418212	1.1214	No-diff
ICMT	O60725	0.00549975	1.1214	No-diff
CCT7	Q99832	0.00434576	1.1213	No-diff
HINT3	Q9NQE9	0.0331313	1.1213	No-diff
NFKB1	P19838	0.0180574	1.1212	No-diff
PPAT	Q06203	0.00924357	1.1207	No-diff
RPAP3	Q9H6T3	0.000572011	1.1205	No-diff
ARPP19	P56211	0.0184866	1.1204	No-diff
RNASEH2C	Q8TDP1	0.000180787	1.1202	No-diff
MPI	P34949	0.000736934	1.1201	No-diff
EDC3	Q96F86	0.00114323	1.12	No-diff
PSMB2	P49721	0.0104515	1.1199	No-diff
GATAD2A	Q86YP4	0.0419802	1.1196	No-diff
ANP32B	Q92688	0.00873088	1.1194	No-diff
WDR41	Q9HAD4	0.0107328	1.1194	No-diff
SKA1	Q96BD8	0.0381257	1.1192	No-diff
GOT1	P17174	0.000420237	1.119	No-diff
STRN3	Q13033	0.0127606	1.1189	No-diff
ATXN10	Q9UBB4	0.00101564	1.1188	No-diff
PI4KB	Q14694	0.0494291	1.1188	No-diff
ENO1	P06733	0.0070127	1.1187	No-diff
RPUSD2	Q8IZ73	0.0284088	1.1186	No-diff
CORO1B	Q9BR76	0.00452877	1.1184	No-diff
RBM42	Q9BTD8	0.0144294	1.1183	No-diff
RBM8A	Q9Y5S9	0.0154253	1.1181	No-diff
TFDP1	Q14186	0.0275197	1.1178	No-diff
GTF2F2	P13984	0.00426341	1.1176	No-diff
DSTN	P60981	0.00186492	1.1171	No-diff
RPF1	Q9H9Y2	0.0108441	1.1171	No-diff
POLR3B	Q9NW08	1.50067e-05	1.117	No-diff
VPS33A	Q96AX1	1.54222e-05	1.117	No-diff
FUBP1	Q96AE4	0.0291705	1.1169	No-diff
DIP2B	Q9P265	0.00573165	1.1168	No-diff
TUBG1	P23258	0.0195777	1.1167	No-diff
UBE2L3	P68036	0.0157754	1.1165	No-diff
PAFAH1B2	P68402	0.00182529	1.1164	No-diff
EIF2B1	Q14232	0.00920917	1.1163	No-diff
VBP1	P61758	0.0108739	1.1162	No-diff
LCP1	P13796	0.00271488	1.1159	No-diff
FARP1	Q9Y4F1	0.00325767	1.1159	No-diff
PRMT1	Q99873	0.000176099	1.1158	No-diff
GPN1	Q9HCN4	0.00328636	1.1156	No-diff
RNASEH2A	O75792	0.00414941	1.1156	No-diff
PSMD12	O00232	0.00177145	1.1155	No-diff
RAD23B	P54727	0.022752	1.1152	No-diff
CETN2	P41208	0.0287162	1.1151	No-diff
CUL3	Q13618	0.00264792	1.1149	No-diff
SNX1	Q13596	0.00855167	1.1149	No-diff
ZC3H8	Q8N5P1	0.0300345	1.1148	No-diff
CDC23	Q9UJX2	0.000540292	1.1146	No-diff
QPRT	Q15274	0.0223767	1.1145	No-diff
SBDS	Q9Y3A5	0.0020953	1.1144	No-diff
PELI1	Q96FA3	0.000126248	1.1143	No-diff
DUSP11	O75319	0.0137663	1.114	No-diff
ALDOA	P04075	3.10567e-05	1.1135	No-diff
UPF1	Q92900	0.00624055	1.1135	No-diff
CUL2	Q13617	0.0021595	1.1133	No-diff
ZNF512B	Q96KM6	0.0122658	1.1132	No-diff
PSMA7	O14818	0.00426182	1.1131	No-diff
GON7	Q9BXV9	0.00578887	1.113	No-diff
RPS8	P62241	0.0290272	1.113	No-diff
PPIA	P62937	0.000618353	1.1129	No-diff
OSBPL11	Q9BXB4	0.00504893	1.1127	No-diff
SLC20A2	Q08357	0.0356822	1.1126	No-diff
FLNB	O75369	0.000400402	1.1124	No-diff
RNPEP	Q9H4A4	0.000617661	1.1124	No-diff
OTUB1	Q96FW1	0.00595989	1.1124	No-diff
FUS	P35637	0.0208004	1.1123	No-diff
PSMG1	O95456	0.00218031	1.1122	No-diff
RPL3	P39023	7.1596e-05	1.1121	No-diff
POLR1B	Q9H9Y6	0.000909087	1.1119	No-diff
PLS3	P13797	0.00100569	1.1116	No-diff
STIP1	P31948	0.00262528	1.1115	No-diff
CMPK1	P30085	0.0377724	1.1111	No-diff
PAK1	Q13153	0.00179938	1.111	No-diff
TXNDC17	Q9BRA2	0.0105256	1.111	No-diff
TMSB4X	P62328	0.00485063	1.1108	No-diff
PITHD1	Q9GZP4	0.0163308	1.1108	No-diff
NCAPD2	Q15021	0.00036406	1.1107	No-diff
RPLP0	P05388	0.00170778	1.1107	No-diff
GPATCH4	Q5T3I0	0.00317167	1.1107	No-diff
HPRT1	P00492	0.00384146	1.1105	No-diff
TRMT6	Q9UJA5	0.0195848	1.1105	No-diff
SMS	P52788	0.0100404	1.1103	No-diff
UROD	P06132	0.0156519	1.1103	No-diff
LMO7	Q8WWI1	0.000977791	1.1102	No-diff
EXOC7	Q9UPT5	0.0208941	1.1102	No-diff
CIT	O14578	0.00952191	1.11	No-diff
CPPED1	Q9BRF8	0.0113762	1.1099	No-diff
CRKL	P46109	0.0015852	1.1098	No-diff
MACF1	Q9UPN3	6.75914e-05	1.1092	No-diff
RPL9	P32969	0.000364502	1.1092	No-diff
POLD2	P49005	0.00115216	1.1091	No-diff
PEBP1	P30086	2.08391e-05	1.109	No-diff
PSMC4	P43686	0.00598153	1.1086	No-diff
ACTR2	P61160	0.0205695	1.1085	No-diff
PPME1	Q9Y570	0.000476588	1.1084	No-diff
BRCC3	P46736	0.0185381	1.1084	No-diff
PGAM1	P18669	0.0110613	1.1083	No-diff
CCT5	P48643	0.000127258	1.1081	No-diff
MPRIP	Q6WCQ1	0.00274055	1.108	No-diff
SET	Q01105	0.0133955	1.108	No-diff
RPL7	P18124	0.010573	1.1079	No-diff
CERS2	Q96G23	0.00836567	1.1078	No-diff
EZH2	Q15910	0.000611362	1.1075	No-diff
NQO1	P15559	0.0304504	1.1074	No-diff
FXR1	P51114	0.000221357	1.1072	No-diff
CMTR1	Q8N1G2	0.00307724	1.1072	No-diff
ADAM15	Q13444	0.0147153	1.1072	No-diff
CD2AP	Q9Y5K6	0.0167568	1.1069	No-diff
IRF2BP2	Q7Z5L9	0.0109179	1.1067	No-diff
RBM4	Q9BWF3	0.0107949	1.1066	No-diff
EPS8L1	Q8TE68	0.0215742	1.1065	No-diff
ACTN4	O43707	0.000469866	1.1064	No-diff
BTAF1	O14981	0.0253022	1.1062	No-diff
QTRT2	Q9H974	0.00745553	1.1061	No-diff
MTA2	O94776	2.47102e-05	1.106	No-diff
PPP2R1A	P30153	0.000325195	1.106	No-diff
THUMPD1	Q9NXG2	0.000838776	1.1059	No-diff
EIF3A	Q14152	0.000140969	1.1054	No-diff
LSM14B	Q9BX40	0.0388033	1.105	No-diff
PPIL1	Q9Y3C6	0.00683711	1.1048	No-diff
PGM2	Q96G03	0.000605678	1.1047	No-diff
POLR2I	P36954	0.0161436	1.1046	No-diff
RPS24	P62847	0.00250346	1.1045	No-diff
SMARCD1	Q96GM5	0.00206581	1.1044	No-diff
CCT6A	P40227	0.0375569	1.1044	No-diff
PSMB5	P28074	0.0281313	1.1043	No-diff
EIF3H	O15372	0.00396985	1.1041	No-diff
EED	O75530	0.0146029	1.1041	No-diff
CDC37	Q16543	0.00220188	1.104	No-diff
EPS15L1	Q9UBC2	0.00529806	1.104	No-diff
MFN2	O95140	0.00601219	1.104	No-diff
RPL27	P61353	0.00880757	1.104	No-diff
HMGB2	P26583	0.00993271	1.1038	No-diff
ATXN2L	Q8WWM7	0.00308559	1.1036	No-diff
ACAT2	Q9BWD1	0.0063872	1.1035	No-diff
PSMD5	Q16401	0.0056587	1.1034	No-diff
CYFIP1	Q7L576	0.00584134	1.1033	No-diff
CAB39	Q9Y376	0.00518491	1.103	No-diff
CCT4	P50991	0.0271005	1.103	No-diff
SPC24	Q8NBT2	0.0215508	1.1028	No-diff
MNAT1	P51948	0.0198627	1.1026	No-diff
SHMT1	P34896	0.0417968	1.1026	No-diff
DDX24	Q9GZR7	0.0352437	1.1025	No-diff
NMT1	P30419	0.0432457	1.1025	No-diff
OSBPL3	Q9H4L5	0.0127749	1.1022	No-diff
POLR2L	P62875	0.0239993	1.1022	No-diff
SEPTIN8	Q92599	0.0250733	1.1022	No-diff
PSMD6	Q15008	0.00342558	1.102	No-diff
AIMP1	Q12904	0.0128731	1.102	No-diff
HSPA4	P34932	4.28819e-05	1.1019	No-diff
TNPO3	Q9Y5L0	0.00337746	1.1017	No-diff
DRG2	P55039	0.0115966	1.1015	No-diff
LDHB	P07195	0.00108332	1.1014	No-diff
DDAH2	O95865	0.00816219	1.1013	No-diff
EIF3C	Q99613	0.00308653	1.1012	No-diff
NASP	P49321	0.00413508	1.1012	No-diff
PSMA6	P60900	0.0103035	1.1009	No-diff
YTHDF1	Q9BYJ9	0.00185709	1.1007	No-diff
HTT	P42858	0.0022705	1.1007	No-diff
RPL27A	P46776	0.0282148	1.1007	No-diff
STK24	Q9Y6E0	0.0363557	1.1006	No-diff
RNASEH2B	Q5TBB1	0.00240145	1.1004	No-diff
ANKS1A	Q92625	0.00995788	1.1004	No-diff
LGALS2	P05162	0.00657538	1.1003	No-diff
SGTB	Q96EQ0	0.0389647	1.1003	No-diff
SRPK1	Q96SB4	0.0130734	1.1002	No-diff
DNPEP	Q9ULA0	0.00054755	1.1001	No-diff
EIF2B3	Q9NR50	0.0137494	1.1001	No-diff
RNF40	O75150	0.040813	1.1001	No-diff
ANXA5	P08758	8.54824e-05	1.1	No-diff
PYGL	P06737	0.00127738	1.0999	No-diff
UBE2E1	P51965	0.00919174	1.0998	No-diff
MBD3	O95983	0.00206769	1.0996	No-diff
TXN	P10599	0.0312725	1.0996	No-diff
BRAT1	Q6PJG6	0.0268896	1.0995	No-diff
ECE1	P42892	0.0301763	1.0994	No-diff
SH3GL1	Q99961	0.0327836	1.0994	No-diff
RBM12	Q9NTZ6	0.00185065	1.0992	No-diff
TUBB8	Q3ZCM7	0.000600217	1.099	No-diff
RCN1	Q15293	0.00482328	1.0987	No-diff
ZNF207	O43670	0.009133	1.0982	No-diff
DDAH1	O94760	0.00999011	1.0982	No-diff
CAD	P27708	4.90524e-05	1.0975	No-diff
PTP4A2	Q12974	0.00122552	1.0975	No-diff
NAP1L4	Q99733	0.0045898	1.0975	No-diff
PFKP	Q01813	0.000701447	1.0974	No-diff
UBE2O	Q9C0C9	0.00209842	1.0974	No-diff
LGALS8	O00214	0.00899322	1.0973	No-diff
DNAJC8	O75937	0.0189123	1.0971	No-diff
UBA3	P14854	0.0492271	1.0971	No-diff
SERPINH1	P50454	0.0146105	1.097	No-diff
LGALS3	P17931	0.0191762	1.097	No-diff
TUBB4B	P68371	0.00114797	1.0967	No-diff
ELP1	O95163	0.0273676	1.0965	No-diff
ASPSCR1	Q9BZE9	0.0300498	1.0963	No-diff
HSPA8	P11142	0.0140536	1.0961	No-diff
CUL4A	Q13619	0.000372726	1.096	No-diff
MARK2	Q7KZI7	0.000226913	1.0958	No-diff
YWHAH	Q04917	0.00668194	1.0958	No-diff
TPD52L2	O43399	0.00974962	1.0957	No-diff
PAK4	O96013	0.0264136	1.0951	No-diff
MTHFD1	P11586	0.00602284	1.095	No-diff
EWSR1	Q01844	0.00228889	1.0949	No-diff
ITPA	Q9BY32	0.0115845	1.0944	No-diff
CAP1	Q01518	0.0113593	1.0943	No-diff
HAT1	O14929	0.00592424	1.0939	No-diff
MYO6	Q9UM54	0.000198277	1.0938	No-diff
SF3B5	Q9BWJ5	0.0397175	1.0936	No-diff
PNPO	Q9NVS9	0.00255726	1.0932	No-diff
APEH	P13798	0.00392496	1.0931	No-diff
TOM1L1	O75674	0.00405478	1.0929	No-diff
AGL	P35573	0.0288067	1.0927	No-diff
HUWE1	Q7Z6Z7	0.00439768	1.0925	No-diff
SOS1	Q07889	0.00297227	1.0921	No-diff
AHCYL1	O43865	0.0210822	1.0921	No-diff
RPL10A	P62906	0.00027955	1.0919	No-diff
ATP6V1A	P38606	0.00298471	1.0917	No-diff
COPS6	Q7L5N1	0.011979	1.0917	No-diff
GSPT1	P15170	0.000527645	1.0914	No-diff
LRRC47	Q8N1G4	0.00153477	1.0912	No-diff
RAP1GDS1	P52306	0.0186517	1.0912	No-diff
HBS1L	Q9Y450	0.00503223	1.091	No-diff
UBE3A	Q05086	0.00286016	1.0906	No-diff
DCUN1D5	Q9BTE7	0.0410589	1.0901	No-diff
RPL13A	P40429	0.0161814	1.0895	No-diff
GSR	P00390	0.000319257	1.0894	No-diff
ISOC1	Q96CN7	0.0035786	1.0894	No-diff
TRIP11	Q15643	0.000341092	1.089	No-diff
CTPS2	Q9NRF8	0.00053295	1.0889	No-diff
COPS8	Q99627	0.00168305	1.0889	No-diff
RPL19	P84098	0.00512527	1.0888	No-diff
FAM50A	Q14320	0.000645784	1.0885	No-diff
KIF3B	O15066	0.00213945	1.0885	No-diff
NANS	Q9NR45	0.000311131	1.0882	No-diff
DFFA	O00273	0.0160642	1.0879	No-diff
TMEM201	Q5SNT2	0.0226615	1.0878	No-diff
DCTN1	Q14203	0.00018118	1.0877	No-diff
AAMP	Q13685	0.00173719	1.0876	No-diff
METTL16	Q86W50	0.0292461	1.0876	No-diff
CAPZA1	P52907	0.000158452	1.0874	No-diff
MAP4	P27816	0.00842841	1.0873	No-diff
E4F1	Q66K89	0.0446084	1.0871	No-diff
RIOX2	Q8IUF8	0.012695	1.087	No-diff
NAA25	Q14CX7	0.00135338	1.0868	No-diff
SEC23IP	Q9Y6Y8	0.00220128	1.0865	No-diff
RPL5	P46777	0.0093043	1.0865	No-diff
DNTTIP1	Q9H147	0.0296321	1.0865	No-diff
SPINT2	O43291	0.0350715	1.0861	No-diff
DDX5	P17844	0.00280223	1.0856	No-diff
RPL23	P62829	0.00406469	1.0855	No-diff
EPS8L2	Q9H6S3	0.00715229	1.0855	No-diff
CSNK1A1	P48729	0.011925	1.0855	No-diff
AIMP2	Q13155	0.00061314	1.0854	No-diff
DNM1L	O00429	0.00519823	1.0853	No-diff
HNRNPDL	O14979	0.00602617	1.0853	No-diff
GMDS	O60547	0.00859037	1.0853	No-diff
MCM3	P25205	0.00687266	1.0852	No-diff
LUC7L2	Q9Y383	0.000511387	1.0848	No-diff
GIPC1	O14908	0.00210163	1.0847	No-diff
ARPC3	O15145	0.000520462	1.0845	No-diff
PPP2R1B	P30154	0.00316293	1.0845	No-diff
UCHL3	P15374	0.00757596	1.0845	No-diff
VPS4B	O75351	0.0301909	1.0845	No-diff
COPS2	P61201	0.0278956	1.0844	No-diff
MYH14	Q7Z406	0.00435515	1.0842	No-diff
PSMG3	Q9BT73	0.0188509	1.0841	No-diff
BLMH	Q13867	0.00277392	1.084	No-diff
ELP2	Q6IA86	0.0204242	1.0837	No-diff
CSNK2A1	P68400	0.00153784	1.0834	No-diff
MGMT	P16455	0.0232531	1.0833	No-diff
KIRREL1	Q96J84	0.0213003	1.0832	No-diff
HDAC3	O15379	0.00685482	1.0828	No-diff
PPP6R3	Q5H9R7	0.00028448	1.0827	No-diff
AP3M1	Q9Y2T2	0.0334973	1.0827	No-diff
TNKS1BP1	Q9C0C2	0.00933428	1.0824	No-diff
SYNPO	Q8N3V7	0.0332106	1.0824	No-diff
GEMIN5	Q8TEQ6	0.00166499	1.0823	No-diff
GNPDA1	P46926	0.000448079	1.0821	No-diff
DDX56	Q9NY93	0.00140429	1.0821	No-diff
PRRC2C	Q9Y520	0.00118461	1.0819	No-diff
TXNRD1	Q16881	0.00310291	1.0818	No-diff
PAIP1	Q9H074	0.0025648	1.0811	No-diff
HSP90AA1	P07900	0.000400263	1.0805	No-diff
UBL4A	P11441	0.00548561	1.0803	No-diff
EMC7	Q9NPA0	0.0316204	1.0803	No-diff
NAA15	Q9BXJ9	0.0202431	1.0802	No-diff
CAPZA2	P47755	0.00385536	1.0801	No-diff
GNPNAT1	Q96EK6	0.0368912	1.0801	No-diff
DICER1	Q9UPY3	0.00949003	1.08	No-diff
NECAP2	Q9NVZ3	0.0190967	1.0798	No-diff
CHD8	Q9HCK8	0.0238946	1.0797	No-diff
RBBP7	Q16576	0.00408252	1.0794	No-diff
GBF1	Q92538	0.00151263	1.0793	No-diff
TRMT5	Q32P41	0.00249853	1.0793	No-diff
DCPS	Q96C86	0.0312164	1.0793	No-diff
RPS4X	P62701	0.0143099	1.0792	No-diff
PITPNB	P48739	0.00781362	1.0791	No-diff
ANXA7	P20073	0.0406677	1.0787	No-diff
ABHD14B	Q9UBF8	0.0495394	1.0785	No-diff
EMC1	Q8N766	0.0145309	1.0784	No-diff
ERC1	Q8IUD2	0.0439351	1.0784	No-diff
EIF5B	O60841	0.00125525	1.0782	No-diff
ABCF3	Q9NUQ8	0.00454097	1.0781	No-diff
COPS4	Q9BT78	0.0053987	1.0781	No-diff
UFD1	Q92890	0.000606911	1.0777	No-diff
DIAPH1	O60610	0.00722914	1.0776	No-diff
SRP72	O76094	0.0172516	1.0776	No-diff
TUBGCP2	Q9BSJ2	0.0068235	1.0773	No-diff
TPMT	P51580	0.0113704	1.0771	No-diff
GLRX3	O76003	0.00117364	1.0769	No-diff
EIF3L	Q9Y262	0.0095953	1.0768	No-diff
PSMC6	P62333	0.00348241	1.0767	No-diff
STARD10	Q9Y365	0.00168796	1.0762	No-diff
LUC7L	Q9NQ29	0.0261655	1.0762	No-diff
GPI	P06744	0.000612257	1.076	No-diff
SMPD4	Q9NXE4	0.000673881	1.0759	No-diff
ALDH9A1	P49189	0.0435888	1.0757	No-diff
XPO5	Q9HAV4	0.00255932	1.0754	No-diff
MMS19	Q96T76	0.00271017	1.0752	No-diff
RTCB	Q9Y3I0	0.010028	1.0752	No-diff
NDUFC2	O95298	0.0129928	1.075	No-diff
XXYLT1	Q8NBI6	0.0386164	1.075	No-diff
TSN	Q15631	0.0398641	1.0747	No-diff
MAT2B	Q9NZL9	0.0110291	1.0745	No-diff
MOB1A	Q9H8S9	0.0131492	1.0743	No-diff
DBR1	Q9UK59	0.0178667	1.0743	No-diff
YWHAB	P31946	0.0392745	1.0738	No-diff
ACP1	P24666	0.015592	1.0734	No-diff
RPL15	P61313	0.0425217	1.0734	No-diff
MSH6	P52701	0.000636922	1.0731	No-diff
RPL17	P18621	0.00442654	1.0731	No-diff
DCTN2	Q13561	0.0273195	1.0727	No-diff
METAP1	P53582	0.0243894	1.0725	No-diff
PSMD8	P48556	0.0329299	1.0724	No-diff
LAD1	O00515	0.00739321	1.072	No-diff
RPL7L1	Q6DKI1	0.0142867	1.072	No-diff
PTGES3	Q15185	0.000808861	1.0715	No-diff
NDC80	O14777	0.00991925	1.0715	No-diff
ARPC1B	O15143	0.000492022	1.0712	No-diff
UBE2I	P63279	0.00774223	1.0712	No-diff
DNAJB6	O75190	0.0168871	1.0712	No-diff
AGO2	Q9UKV8	0.00433893	1.071	No-diff
PSMD10	Q9UHA3	0.0474289	1.071	No-diff
POLA1	O75832	0.0474926	1.0707	No-diff
RPL23A	P62750	0.0279764	1.0706	No-diff
INTS13	Q9NVM9	0.00343979	1.0705	No-diff
YWHAE	P62258	0.00302822	1.0704	No-diff
UGP2	Q16851	0.00839162	1.0704	No-diff
GGCT	O75223	0.0123273	1.0704	No-diff
USP3	Q9Y6I4	0.00144156	1.0703	No-diff
USP14	P54578	0.00968282	1.0703	No-diff
TGM2	P21980	0.00360377	1.0702	No-diff
VPS26A	O75436	0.00384349	1.0702	No-diff
LRPAP1	P30533	0.00840365	1.0699	No-diff
FKBP5	Q13451	0.040487	1.0697	No-diff
CNOT3	O75175	0.0236895	1.0695	No-diff
CLPTM1	O96005	0.0013182	1.0693	No-diff
EIF4E2	O60573	0.00192437	1.0693	No-diff
TLK2	Q86UE8	0.00583952	1.0693	No-diff
PURB	Q96QR8	0.0329627	1.0692	No-diff
MESD	Q14696	0.0185586	1.069	No-diff
GPKOW	Q92917	0.037648	1.069	No-diff
OSBP	P22059	0.00458179	1.0689	No-diff
DDX3X	O00571	0.0172957	1.0688	No-diff
ELOB	Q15370	0.00376242	1.0687	No-diff
POLR3A	O14802	0.00031202	1.0684	No-diff
ATP6V1F	Q16864	0.012553	1.0684	No-diff
WDHD1	O75717	0.00197201	1.0683	No-diff
S100A14	Q9HCY8	0.0452881	1.0683	No-diff
BTF3L4	Q96K17	0.000976468	1.0682	No-diff
ACTG1	P63261	8.54217e-05	1.068	No-diff
PABPC4	Q13310	0.00299861	1.068	No-diff
TTLL12	Q14166	0.000560608	1.0677	No-diff
LAMB1	P07942	0.0010128	1.0675	No-diff
CPNE7	Q9UBL6	0.042051	1.0674	No-diff
ZRANB2	O95218	0.0114119	1.0672	No-diff
TLN1	Q9Y490	0.000310267	1.0666	No-diff
CLASP1	Q7Z460	0.00292907	1.0665	No-diff
SH3KBP1	Q96B97	0.0344397	1.0665	No-diff
MAP1S	Q66K74	0.0131448	1.0664	No-diff
PSMB4	P28070	0.00230796	1.0663	No-diff
PPP4C	P60510	0.0129358	1.0662	No-diff
SEPHS1	P49903	0.00505756	1.0659	No-diff
ACTN1	P12814	0.0010471	1.0658	No-diff
UCHL5	Q9Y5K5	0.00974238	1.0656	No-diff
FAH	P16930	0.0288937	1.0656	No-diff
UBA2	Q9UBT2	0.0344648	1.0654	No-diff
USP24	Q9UPU5	0.0101425	1.0653	No-diff
SEPTIN7	Q16181	0.0123174	1.0652	No-diff
FAM98B	Q52LJ0	0.00323192	1.0651	No-diff
RAPH1	Q70E73	0.0054471	1.065	No-diff
TALDO1	P37837	0.0126752	1.065	No-diff
DYNC1H1	Q14204	8.31738e-05	1.0649	No-diff
PTPA	Q15257	0.0148136	1.0649	No-diff
COPS5	P01137	0.0482659	1.0649	No-diff
UBQLN1	Q9UMX0	0.00591246	1.0648	No-diff
MCM6	Q14566	0.0116021	1.0646	No-diff
CSE1L	P55060	0.0200126	1.0646	No-diff
ARHGEF12	Q9NZN5	0.00343675	1.0645	No-diff
HSPA1B	P0DMV9	0.000249447	1.064	No-diff
LIMA1	Q9UHB6	0.000118265	1.0636	No-diff
RPA1	P27694	0.0142045	1.0633	No-diff
UCHL1	P09936	0.0389403	1.0626	No-diff
CDK5RAP1	Q96SZ6	0.0395385	1.0626	No-diff
ANXA6	P08133	0.002843	1.0625	No-diff
DHX29	Q7Z478	0.00224004	1.0619	No-diff
PSMA2	P25787	0.0412718	1.0617	No-diff
RPL4	P36578	0.0133082	1.0616	No-diff
APEX1	P27695	0.00114605	1.0611	No-diff
GAMT	Q14353	0.0332634	1.061	No-diff
TRIP12	Q14669	0.00170173	1.0606	No-diff
RPS27A	P62979	0.0192474	1.0603	No-diff
PGK1	P00558	0.0331024	1.0602	No-diff
TRIM25	Q14258	0.00158704	1.0601	No-diff
VARS1	P26640	0.0101074	1.0598	No-diff
SEC16A	O15027	0.03086	1.0594	No-diff
RTRAF	Q9Y224	0.0259323	1.0593	No-diff
NLRP2	Q9NX02	0.0382148	1.0591	No-diff
DDX1	Q92499	0.0197351	1.0587	No-diff
ATP6V1B2	P21281	0.000603525	1.0585	No-diff
NDUFB11	Q9NX14	0.0198542	1.0584	No-diff
SRP68	Q9UHB9	0.0209453	1.0581	No-diff
CACYBP	Q9HB71	0.0386719	1.0579	No-diff
ACTL6A	O96019	0.00683072	1.0578	No-diff
WDR12	P43243	0.0462375	1.0574	No-diff
VPS29	Q9UBQ0	0.00108782	1.057	No-diff
ATP6V1D	Q9Y5K8	0.0438339	1.057	No-diff
MYH10	P35580	0.000402215	1.0568	No-diff
DIS3	Q9Y2L1	0.0375274	1.0568	No-diff
CC2D1A	Q6P1N0	0.00471963	1.0565	No-diff
CPSF3	Q9UKF6	0.00313049	1.0564	No-diff
FARSB	Q9NSD9	0.0355973	1.056	No-diff
SUPT6H	Q7KZ85	0.00206881	1.0553	No-diff
STAT3	P40763	0.0345555	1.055	No-diff
BCCIP	Q9P287	0.00217711	1.0545	No-diff
RAN	P62826	0.00019031	1.0542	No-diff
SEC31A	O94979	0.00416512	1.0542	No-diff
CSNK2B	P67870	0.0321392	1.0542	No-diff
SORD	Q00796	0.0092581	1.0539	No-diff
QARS1	P47897	0.0139789	1.0538	No-diff
ROCK2	O75116	9.54582e-05	1.0533	No-diff
GAPVD1	Q14C86	0.0128871	1.0533	No-diff
CCT2	P78371	0.012214	1.053	No-diff
PRDX1	Q06830	0.00403134	1.0529	No-diff
OGFR	Q9NZT2	0.0211515	1.0526	No-diff
NDUFA9	Q16795	0.0455448	1.0522	No-diff
NDUFB4	Q92905	0.0483487	1.0515	No-diff
XRCC4	Q13426	0.0415005	1.0514	No-diff
TCP1	P17987	0.00134058	1.051	No-diff
NOMO2	Q5JPE7	0.028076	1.0507	No-diff
EIF2S2	P20042	0.0119931	1.0504	No-diff
PCBP1	Q15365	0.00127191	1.0502	No-diff
DHX38	P00491	0.0478524	1.0501	No-diff
MCM4	P33991	0.0222934	1.0498	No-diff
EFL1	Q7Z2Z2	0.0419343	1.0497	No-diff
KIF5B	P33176	0.000159618	1.0496	No-diff
CDKAL1	Q5VV42	0.00729315	1.0486	No-diff
PRPSAP2	O60256	0.022325	1.0485	No-diff
RAC1	P63000	0.00666139	1.0479	No-diff
U2AF1L5	P0DN76	0.0371184	1.047	No-diff
ERAP1	Q9NZ08	0.00212017	1.0469	No-diff
SVIL	O95425	0.0417764	1.0468	No-diff
SF1	Q15637	0.0014706	1.0459	No-diff
MCM2	P49736	0.0201383	1.0455	No-diff
ACTR3	P61158	0.0228828	1.0454	No-diff
RPAP1	Q9BWH6	0.0369454	1.0453	No-diff
ARFGEF2	Q9Y6D5	0.0237563	1.0451	No-diff
GART	P22102	0.0186125	1.045	No-diff
AHNAK	Q09666	0.0118841	1.0446	No-diff
PSMC3	P17980	0.00641512	1.0436	No-diff
UBR4	Q5T4S7	0.00520488	1.0433	No-diff
PRKRA	O75569	0.0164447	1.0426	No-diff
THOC3	Q96J01	0.00848992	1.0414	No-diff
PNP	Q9NYL2	0.0476437	1.0403	No-diff
DHX30	Q7L2E3	0.0204513	1.04	No-diff
TNPO1	Q92973	8.23255e-05	1.0397	No-diff
EDC4	Q6P2E9	0.020096	1.0392	No-diff
SERINC1	Q9NRX5	0.0310255	1.0392	No-diff
ACTR1A	P61163	0.0330206	1.0391	No-diff
NEK9	Q8TD19	0.00113814	1.0388	No-diff
EIF2S1	P05198	0.000825567	1.0365	No-diff
HYOU1	Q9Y4L1	0.000774426	1.0363	No-diff
MYDGF	Q969H8	0.00119445	1.0359	No-diff
UNG	P13051	0.00374633	1.0352	No-diff
GFPT1	Q06210	0.0392603	1.0351	No-diff
CAPN1	P07384	0.00231351	1.0349	No-diff
ST14	Q9Y5Y6	0.0264221	1.0334	No-diff
SEC13	P55735	0.0321094	1.0325	No-diff
ASNS	P08243	0.0010047	1.0322	No-diff
USP10	Q8TBC4	0.0493094	1.0302	No-diff
NCAPH	Q15003	0.038893	1.0267	No-diff
EXOSC1	Q8N3R9	0.0490602	1.0254	No-diff
CHD4	Q14839	0.00662389	1.025	No-diff
APPL2	Q8NEU8	0.00906343	1.0238	No-diff
SUPT5H	Q9GZL7	0.046265	1.0212	No-diff
AP3D1	O14617	0.0294291	1.0204	No-diff
LAMA5	O15230	0.00162654	1.0156	No-diff
SAFB	Q15424	0.022593	0.9799	No-diff
XRCC5	P13010	0.00752411	0.9769	No-diff
PICALM	Q13492	0.0018065	0.9763	No-diff
SPTAN1	Q13813	0.000986046	0.973	No-diff
RPP30	P78346	0.0271653	0.9724	No-diff
DDX54	Q8TDD1	0.012297	0.9719	No-diff
XRCC6	P12956	0.015394	0.9715	No-diff
FH	P07954	0.00484325	0.9713	No-diff
USP7	Q93009	0.017017	0.971	No-diff
PACSIN3	P18850	0.0463715	0.9704	No-diff
WDFY1	Q8IWB7	0.0246875	0.97	No-diff
COPB1	Q96F07	0.0498783	0.9696	No-diff
SRSF11	Q05519	0.00535375	0.9689	No-diff
CANX	P27824	0.016206	0.9673	No-diff
ZNF326	Q5BKZ1	0.0202989	0.9671	No-diff
SPTBN1	Q01082	0.0149789	0.9669	No-diff
CLTC	Q00610	0.00763307	0.9667	No-diff
PPP1CA	P62136	0.0380106	0.9659	No-diff
RFC3	P40938	0.0301451	0.9645	No-diff
PPL	O60437	0.0310106	0.9639	No-diff
HNMT	P50135	0.00187585	0.9631	No-diff
LLGL1	Q15334	0.0214494	0.9629	No-diff
HPDL	Q96IR7	0.0354441	0.9616	No-diff
PTCD1	P50416	0.046673	0.9614	No-diff
SAP30BP	Q9UHR5	0.010967	0.9612	No-diff
PLOD1	Q02809	0.017856	0.961	No-diff
DDX47	Q9H0S4	0.0344903	0.9603	No-diff
PRPF8	Q6P2Q9	0.00708608	0.96	No-diff
SIL1	Q9H173	0.040247	0.9597	No-diff
DDX21	Q9NR30	0.00167103	0.9596	No-diff
HNRNPUL1	Q9BUJ2	0.0120161	0.9588	No-diff
MRE11	P49959	0.0312521	0.9583	No-diff
DHX37	Q8IY37	0.0281633	0.9575	No-diff
PUF60	Q9UHX1	0.00971913	0.9564	No-diff
RSF1	Q96T23	0.00447481	0.9563	No-diff
AP2A2	O94973	0.00015182	0.9561	No-diff
HNRNPD	Q14103	0.0356435	0.9559	No-diff
CCDC47	Q96A33	0.000759037	0.9555	No-diff
BAZ1B	Q9UIG0	0.0121099	0.9555	No-diff
GNL2	Q13823	0.0160146	0.9555	No-diff
GCA	P28676	0.0456425	0.9547	No-diff
BAG2	O95816	0.0013315	0.9543	No-diff
IST1	P53990	0.0434219	0.9542	No-diff
XPO1	O14980	2.94858e-05	0.9533	No-diff
SART1	O43290	0.0213252	0.9533	No-diff
ERP44	Q9BS26	0.0208394	0.9532	No-diff
PLEC	Q15149	0.0143678	0.953	No-diff
TPR	P12270	0.0294725	0.9524	No-diff
EPB41L5	Q9HCM4	0.00114914	0.9522	No-diff
RNF2	Q99496	0.0274025	0.9521	No-diff
CES1	P23141	0.0349919	0.952	No-diff
M6PR	P20645	0.00462083	0.9519	No-diff
GTF2I	P78347	0.00873823	0.9518	No-diff
LRRC57	Q8N9N7	0.0357516	0.9515	No-diff
ORC5	O43913	0.0426627	0.9513	No-diff
U2AF2	P26368	0.00120697	0.9512	No-diff
RANBP2	P49792	0.000298946	0.9508	No-diff
DNAJB12	Q9NXW2	0.00447871	0.95	No-diff
FUBP3	Q96I24	0.0282932	0.9497	No-diff
PIGT	Q969N2	0.0212555	0.9496	No-diff
CARMIL1	Q5VZK9	0.0162954	0.949	No-diff
MATR3	Q27J81	0.0461945	0.949	No-diff
RTN4	Q9NQC3	0.0169179	0.9483	No-diff
MRPS9	P82933	0.0022838	0.9481	No-diff
RANGAP1	P46060	0.000874647	0.9478	No-diff
LLPH	Q9BRT6	0.0289927	0.9478	No-diff
NELFA	Q9H3P2	0.00625762	0.9476	No-diff
BCLAF1	Q9NYF8	0.00662059	0.9476	No-diff
NUP88	Q99567	0.0105837	0.9473	No-diff
DSP	P15924	0.011888	0.9471	No-diff
RAE1	P78406	0.0174816	0.947	No-diff
CD99	P14209	0.0158878	0.9462	No-diff
ILF3	Q12906	0.00302934	0.9459	No-diff
SCFD2	Q8WU76	0.0217716	0.9459	No-diff
MKI67	P46013	0.00264047	0.9453	No-diff
BANF1	O75531	0.00309499	0.945	No-diff
CDC16	Q13042	0.00152039	0.9448	No-diff
HNRNPAB	Q99729	0.00437038	0.9447	No-diff
EPB41L2	O43491	0.0247834	0.9447	No-diff
YME1L1	Q96TA2	0.021124	0.9446	No-diff
NUP214	P35658	0.00200612	0.9443	No-diff
IARS1	P41252	0.00636698	0.9443	No-diff
DAZAP1	Q96EP5	0.0448595	0.944	No-diff
GRSF1	Q12849	0.00543806	0.9439	No-diff
TBL1XR1	Q9BZK7	0.00772164	0.9439	No-diff
SF3B2	Q13435	0.0190234	0.9439	No-diff
MRPL15	Q9P015	0.0323769	0.9439	No-diff
MAP2K1	Q02750	0.00100444	0.9437	No-diff
MTX1	Q13505	0.0131388	0.9436	No-diff
RPRD2	Q96IU4	0.0495598	0.9436	No-diff
ATAD3A	Q9NVI7	0.00372366	0.9433	No-diff
SF3B1	O75533	0.00026764	0.943	No-diff
RBM25	P49756	0.0207084	0.9428	No-diff
PPAN	Q9NQ55	0.0400557	0.9428	No-diff
GANAB	Q14697	0.00202754	0.9422	No-diff
DNAJB11	Q9UBS4	0.0234351	0.9419	No-diff
SLC2A3	Q99442	0.0469458	0.9416	No-diff
MAVS	Q7Z434	0.00464555	0.9415	No-diff
CELF1	Q92879	0.0313364	0.9413	No-diff
UBE4A	Q14139	0.00868534	0.9411	No-diff
SRP14	P37108	0.0322838	0.9411	No-diff
RFC5	P40937	0.00268563	0.9409	No-diff
UBR5	O95071	0.0443495	0.9408	No-diff
UGT1A6	P19224	0.00658679	0.9406	No-diff
TM9SF2	Q99805	0.000583045	0.9402	No-diff
PTGES2	Q9H7Z7	0.0228527	0.9401	No-diff
DNAJC13	O75165	0.00236741	0.94	No-diff
HNRNPK	P61978	0.00221076	0.9398	No-diff
CCAR2	Q8N163	0.00336952	0.9398	No-diff
CENPV	Q7Z7K6	0.0214222	0.9398	No-diff
ORC3	Q9UBD5	0.00269446	0.9396	No-diff
NAALAD2	O75167	0.0489825	0.9396	No-diff
TAF4	O00268	0.0166935	0.9395	No-diff
ERO1A	Q96HE7	0.00115812	0.9393	No-diff
YLPM1	P49750	0.0034485	0.9392	No-diff
TMX3	Q96JJ7	0.0389937	0.9388	No-diff
MRPL3	Q6ZSR9	0.0461092	0.9384	No-diff
ILF2	Q12905	0.00288282	0.9383	No-diff
UTP18	Q9Y5J1	0.00565113	0.9382	No-diff
HIRA	P54198	0.00167858	0.9381	No-diff
NAT10	Q9H0A0	0.00749988	0.9381	No-diff
GNA11	P29992	0.0337859	0.9376	No-diff
XAB2	Q9HCS7	0.00107783	0.9374	No-diff
SF3A1	Q15459	0.000845333	0.9371	No-diff
GNAI2	P04899	0.0193778	0.9369	No-diff
GOLGB1	Q14789	0.0132558	0.9365	No-diff
UFL1	O94874	0.0192117	0.9364	No-diff
MRPS24	Q96EL2	0.0452719	0.9364	No-diff
MYO1D	O94832	0.0079941	0.9362	No-diff
EXOC4	Q96A65	0.0409843	0.9357	No-diff
TMEM209	Q96SK2	0.00972468	0.9355	No-diff
UFSP2	Q9NUQ7	0.00162937	0.935	No-diff
NELFB	Q8WX92	0.00295782	0.935	No-diff
HNRNPA0	Q13151	0.00343054	0.935	No-diff
GNB1	P62873	0.0383189	0.9347	No-diff
NUDT9	Q9BW91	0.000773843	0.9346	No-diff
ATPAF2	Q8N5M1	0.000109972	0.9343	No-diff
TMED3	Q9Y3Q3	0.0159574	0.9342	No-diff
EARS2	Q5JPH6	0.0165068	0.9342	No-diff
LRRC1	Q9BTT6	0.0230083	0.9342	No-diff
MTARC1	Q5VT66	0.0356988	0.9341	No-diff
MRPL19	P49406	0.00417057	0.9339	No-diff
TLE3	Q04726	0.020169	0.9338	No-diff
API5	Q9BZZ5	0.0323532	0.9338	No-diff
OXSR1	O95747	0.0422461	0.9337	No-diff
ZMYND8	Q9ULU4	0.0407584	0.9336	No-diff
GFM1	Q96RP9	0.00728593	0.9334	No-diff
SARNP	P82979	0.00808812	0.9333	No-diff
DKC1	O60832	0.000106766	0.9332	No-diff
CHAF1A	Q13111	0.0133685	0.933	No-diff
NOC4L	Q9BVI4	0.0124411	0.9329	No-diff
CYP2S1	Q96SQ9	0.0126457	0.9329	No-diff
GNAS	Q5JWF2	0.0200785	0.9327	No-diff
MRPL32	Q9BYC8	0.016562	0.9326	No-diff
TXNRD2	Q9NNW7	0.0193465	0.9326	No-diff
CDKN2AIP	Q9NXV6	0.0218193	0.9323	No-diff
CNNM3	Q8NE01	0.0274821	0.9321	No-diff
ABHD16A	O95870	0.0277021	0.9321	No-diff
MRPL39	Q9NYK5	0.0101875	0.932	No-diff
RAB10	P61026	0.000251475	0.9317	No-diff
SARS2	Q9NP81	0.0239048	0.9317	No-diff
PUS1	Q9Y606	0.0440595	0.9316	No-diff
EBNA1BP2	Q99848	0.00581229	0.9314	No-diff
SF3A2	Q15428	0.0196003	0.9314	No-diff
FBXO22	Q8NEZ5	0.0160336	0.9311	No-diff
RAB9A	P51151	0.00298083	0.931	No-diff
BOLA3	Q53S33	0.0381903	0.9309	No-diff
RPF2	Q9H7B2	0.00079117	0.9307	No-diff
MED14	O60244	0.0165445	0.9306	No-diff
SNRPB	P14678	0.0028379	0.9305	No-diff
SCAF4	O95104	0.0039334	0.9303	No-diff
ADD1	P35611	0.000978506	0.9302	No-diff
PGRMC2	O15173	0.00285183	0.9301	No-diff
ACP2	P11117	0.0122534	0.9301	No-diff
BCAS2	O75934	0.000488665	0.93	No-diff
PAFAH1B3	Q15102	0.0375842	0.9298	No-diff
PRORP	O15091	0.00615744	0.9297	No-diff
DLST	P36957	0.0170463	0.9294	No-diff
MARS1	P56192	0.00103493	0.9291	No-diff
CNPY2	Q9Y2B0	0.00420814	0.9291	No-diff
SAFB2	Q14151	0.00587137	0.9291	No-diff
SDF2	Q99470	0.00429345	0.9289	No-diff
VAT1	Q99536	0.012467	0.9282	No-diff
LARS1	Q9P2J5	0.00461824	0.928	No-diff
PLOD3	O60568	0.0184265	0.928	No-diff
RBM27	Q9P2N5	0.0362321	0.9279	No-diff
INTS1	Q8N201	0.028954	0.9278	No-diff
NDUFB9	Q9Y6M9	0.0336385	0.927	No-diff
POLR2A	P24928	0.000647077	0.9267	No-diff
NUCB1	Q02818	0.00132188	0.9267	No-diff
DDX55	Q8NHQ9	0.00141245	0.9266	No-diff
PWP1	Q13610	0.00454494	0.9265	No-diff
NUP107	P57740	0.00733531	0.9264	No-diff
NUP155	O75694	0.00133288	0.9263	No-diff
NDUFA5	Q16718	0.00779153	0.9262	No-diff
C7orf50	Q9BRJ6	0.0326768	0.9258	No-diff
ALDH7A1	P49419	0.0177488	0.9257	No-diff
TM9SF3	Q9HD45	0.0236373	0.9257	No-diff
CTNND1	O60716	0.00130785	0.9256	No-diff
AGK	Q53H12	0.00360477	0.9254	No-diff
HNRNPLL	Q8WVV9	0.00294786	0.9251	No-diff
GSTA1	P08263	0.0306947	0.9251	No-diff
ACSL5	Q9ULC5	0.010991	0.9248	No-diff
AP1M1	Q9BXS5	0.0210162	0.9245	No-diff
CDK11A	Q9UQ88	0.00141053	0.9242	No-diff
CPSF6	Q16630	0.0437607	0.9238	No-diff
NONO	Q15233	0.00148003	0.9237	No-diff
HS2ST1	Q7LGA3	0.000238385	0.9236	No-diff
PLIN2	Q99541	0.00385179	0.9235	No-diff
CLPTM1L	Q96KA5	0.00585474	0.9235	No-diff
RAB11B	Q15907	0.0367885	0.9233	No-diff
GNAI3	P08754	0.035939	0.9232	No-diff
THOC7	Q6I9Y2	0.0100725	0.9231	No-diff
RRS1	Q15050	0.00853438	0.9229	No-diff
RBBP5	Q15291	0.00564136	0.9227	No-diff
STX12	Q7Z3U7	0.048614	0.9227	No-diff
HSPA12A	O43301	0.0369646	0.9226	No-diff
HCCS	P53701	0.0135459	0.9225	No-diff
ATPAF1	Q5TC12	0.00105865	0.9222	No-diff
NDUFS4	O43181	0.0262233	0.9221	No-diff
SACM1L	Q9NTJ5	0.0446616	0.9219	No-diff
GTF3C2	Q8WUA4	0.00271403	0.9217	No-diff
AKAP1	Q92667	0.00179464	0.9216	No-diff
NUP160	Q12769	0.00421571	0.9216	No-diff
TARS2	Q9BW92	0.0229848	0.9214	No-diff
COX6B1	Q9NXR1	0.0491673	0.9214	No-diff
CWC22	Q9HCG8	0.000141835	0.9212	No-diff
NUP85	Q9BW27	0.000769121	0.9212	No-diff
CISD1	Q9NZ45	0.00332742	0.9211	No-diff
PRPF6	O94906	0.0143988	0.9211	No-diff
UTP20	O75691	0.000191893	0.921	No-diff
ERLEC1	Q96DZ1	0.00205696	0.921	No-diff
NUDT21	O43809	0.00231474	0.9207	No-diff
TRA2B	P62995	0.00296998	0.9207	No-diff
SLC5A6	Q9Y289	0.0112092	0.9206	No-diff
TMED7	Q9Y3B3	0.0177924	0.9203	No-diff
GFER	P55789	0.0127166	0.9201	No-diff
WDR43	Q15061	0.00648165	0.9199	No-diff
ANXA9	O76027	0.00077875	0.9198	No-diff
RPN2	P04844	0.00443419	0.9196	No-diff
LGMN	Q99538	0.0341514	0.9196	No-diff
RBM15	Q96T37	0.00221486	0.9195	No-diff
WARS2	Q9UGM6	0.0260706	0.9195	No-diff
MDC1	Q14676	0.018946	0.9193	No-diff
ZC3H4	Q9UPT8	0.020314	0.9193	No-diff
ZC3H18	Q86VM9	0.00576875	0.9192	No-diff
IMP4	Q96G21	0.0345174	0.9191	No-diff
PPA2	Q9H2U2	0.0218909	0.9189	No-diff
USP39	Q53GS9	0.00236338	0.9188	No-diff
ACBD3	Q9H3P7	0.00168872	0.9186	No-diff
MARS2	Q96GW9	0.00172403	0.9183	No-diff
MPG	P29372	0.00844866	0.9182	No-diff
MRPL13	Q9BYD1	0.00122047	0.918	No-diff
GTPBP4	Q9BZE4	0.00107646	0.9179	No-diff
NUP205	Q92621	0.00019988	0.9178	No-diff
GTF3C1	Q12789	0.00654857	0.9178	No-diff
LRBA	P50851	0.000234445	0.9177	No-diff
RAB5A	P20339	0.0313523	0.9174	No-diff
ERP29	P30040	0.0384026	0.9174	No-diff
DIEXF	Q68CQ4	0.00249232	0.9173	No-diff
CTNNA1	P35221	0.00134304	0.9172	No-diff
PSAT1	Q9Y617	0.00652743	0.9172	No-diff
MRPS15	P82914	0.00107093	0.9169	No-diff
PON2	Q15165	0.000448618	0.9166	No-diff
NBAS	A2RRP1	0.0146807	0.9166	No-diff
AQR	O60306	0.00668975	0.9165	No-diff
LARS2	Q15031	0.0112651	0.9165	No-diff
FAF2	Q96CS3	0.000427805	0.9163	No-diff
TEX10	Q9NXF1	0.000520706	0.9163	No-diff
PTK7	Q13308	0.0023957	0.9162	No-diff
WDR5	P61964	0.00367634	0.9162	No-diff
NVL	O15381	0.0194679	0.9159	No-diff
VAPA	Q9P0L0	0.00877517	0.9157	No-diff
LRPPRC	P42704	0.00193945	0.9156	No-diff
CDK9	P50750	0.00448103	0.9154	No-diff
GNL3	Q9BVP2	0.00626279	0.9154	No-diff
PAK1IP1	Q9NWT1	0.020831	0.9154	No-diff
TFCP2	Q12800	0.00109597	0.9152	No-diff
GADD45GIP1	Q8TAE8	0.00124265	0.915	No-diff
HSD17B8	Q92506	0.0218794	0.9149	No-diff
PDS5A	Q29RF7	0.000508736	0.9147	No-diff
MYO1B	O43795	0.0052996	0.9147	No-diff
UQCRH	P07919	0.0400231	0.9147	No-diff
TOMM40	O96008	0.00100098	0.9146	No-diff
MARCKS	P29966	0.0124987	0.9145	No-diff
NXF1	Q9UBU9	0.00419696	0.9142	No-diff
CCAR1	Q8IX12	0.00511542	0.9141	No-diff
LETMD1	Q6P1Q0	0.0230485	0.9141	No-diff
TMX1	Q49AR2	0.0488167	0.914	No-diff
GCSH	P23434	6.21751e-06	0.9139	No-diff
TMED9	Q9BVK6	0.0154111	0.9138	No-diff
PRCP	P42785	0.0431425	0.9136	No-diff
DDX17	Q92841	0.0124122	0.9134	No-diff
MRPL41	Q8IXM3	0.013241	0.9134	No-diff
UQCRB	P14927	0.00218515	0.9133	No-diff
PLEKHA5	Q9HAU0	0.00474949	0.9133	No-diff
NDUFA8	P51970	0.0056542	0.9133	No-diff
NDUFS2	O75306	0.0057461	0.9133	No-diff
SLC35E1	Q96K37	0.016396	0.9132	No-diff
COLGALT1	Q8NBJ5	0.0129294	0.9131	No-diff
NOL11	Q9H8H0	0.000345181	0.913	No-diff
CBR1	P16152	0.00684484	0.913	No-diff
MTCH1	Q9NZJ7	0.0115478	0.913	No-diff
P4HA2	O15460	0.00291659	0.9128	No-diff
RPS6KA3	P51812	0.00235759	0.9127	No-diff
FIP1L1	Q6UN15	0.00797869	0.9127	No-diff
LMAN1	P49257	0.000863885	0.9126	No-diff
ALG2	Q9H553	0.0104484	0.9126	No-diff
SCFD1	Q8WVM8	0.000785773	0.9125	No-diff
TMCO1	Q9UM00	0.0372568	0.9125	No-diff
CAMK2D	Q13557	0.00241231	0.9124	No-diff
STXBP3	O00186	0.0238846	0.9124	No-diff
PRPF19	Q9UMS4	0.00146558	0.9123	No-diff
SPPL2A	Q8TCT8	0.0213966	0.9123	No-diff
PDIA6	Q15084	0.0127837	0.9122	No-diff
H4C1	P62805	0.00125696	0.9118	No-diff
PHB	P35232	0.023971	0.9118	No-diff
ERCC3	P19447	0.00379072	0.9115	No-diff
GLE1	Q53GS7	0.00654668	0.9115	No-diff
ZMYM2	Q9UBW7	0.0259933	0.9113	No-diff
LCLAT1	Q6UWP7	0.000129291	0.9112	No-diff
RAB14	P61106	0.00229037	0.911	No-diff
RPN1	P04843	0.000443642	0.9109	No-diff
MYO1C	O00159	0.00353196	0.9109	No-diff
NUP54	Q7Z3B4	5.25411e-05	0.9108	No-diff
MRPS33	Q9Y291	0.00755479	0.9107	No-diff
CDC40	O60508	0.000533083	0.9106	No-diff
NUCB2	P80303	0.00531107	0.9106	No-diff
FLOT1	O75955	0.00105631	0.9104	No-diff
MRPL58	Q14197	0.000817386	0.91	No-diff
YARS2	Q9Y2Z4	0.0135368	0.9094	No-diff
NUP133	Q8WUM0	0.000115821	0.9092	No-diff
ATRX	P46100	0.00399212	0.9092	No-diff
EPHX1	P07099	0.0120463	0.9091	No-diff
TFRC	P02786	0.0050387	0.9089	No-diff
TMEM33	P57088	0.0119172	0.9089	No-diff
HNRNPM	P52272	0.0159633	0.9088	No-diff
EPHA1	P21709	0.00136507	0.9086	No-diff
CD276	Q5ZPR3	0.0391659	0.9086	No-diff
LAS1L	Q9Y4W2	0.0023895	0.9085	No-diff
URB1	O60287	0.00319696	0.9085	No-diff
MRPS5	P82675	0.00483882	0.9084	No-diff
NDUFAF3	Q9BU61	0.0201767	0.9084	No-diff
EXOSC6	Q5RKV6	0.00443974	0.9081	No-diff
SRSF1	Q07955	0.00600072	0.9079	No-diff
PTPMT1	Q8WUK0	0.0186594	0.9079	No-diff
ACOT8	O14734	0.00467601	0.9078	No-diff
RAB5B	P61020	0.0436519	0.9077	No-diff
UQCRFS1	P47985	0.00522005	0.9076	No-diff
ACO2	Q99798	0.00246129	0.9073	No-diff
ORC2	Q13416	0.0157392	0.9072	No-diff
IK	Q13123	5.07169e-05	0.9071	No-diff
RAMAC	Q9BTL3	0.00541176	0.9071	No-diff
PRDX4	Q13162	0.00102458	0.9069	No-diff
ATP1A1	P05023	0.00448385	0.9069	No-diff
DDOST	P39656	0.00594558	0.9069	No-diff
CHCHD2	Q9Y6H1	0.00078732	0.9068	No-diff
MRPS34	P82930	0.00449771	0.9068	No-diff
PHGDH	O43175	0.00580102	0.9064	No-diff
MRPS18B	Q9Y676	0.000256557	0.9063	No-diff
STT3B	Q8TCJ2	0.00769425	0.9061	No-diff
HNRNPU	Q00839	0.000126981	0.906	No-diff
PUM3	Q15397	0.000947235	0.906	No-diff
SNTB2	Q13425	0.00205275	0.906	No-diff
PELP1	Q8IZL8	0.00271923	0.9059	No-diff
ELAVL1	Q15717	0.0240236	0.9059	No-diff
ARAP1	Q96P48	0.00274377	0.9058	No-diff
SPATA5	Q8NB90	0.0256522	0.9056	No-diff
ERAL1	O75616	0.000159275	0.9055	No-diff
COQ9	O75208	0.00813103	0.9052	No-diff
DDX50	Q9BQ39	0.000266929	0.9051	No-diff
NFU1	Q9UMS0	0.0270781	0.9051	No-diff
SRPRA	P08240	1.47052e-05	0.9048	No-diff
AASS	Q9UDR5	0.00013538	0.9048	No-diff
CRNKL1	Q9BZJ0	0.000255281	0.9048	No-diff
PRPF3	O43395	0.00156931	0.9045	No-diff
POLD1	P28340	0.00164002	0.9044	No-diff
SLC25A15	Q9Y619	0.0224578	0.9044	No-diff
NUP58	Q9BVL2	0.0253935	0.9044	No-diff
GOT2	P00505	0.00307166	0.9042	No-diff
CLINT1	Q14677	0.00106555	0.9037	No-diff
SMCHD1	A6NHR9	0.000873145	0.9036	No-diff
USO1	O60763	0.0016681	0.9036	No-diff
ATP5PD	O75947	0.000995366	0.903	No-diff
F11R	Q9Y624	0.0232204	0.903	No-diff
INF2	P09001	0.0461353	0.903	No-diff
RFC4	P35249	0.00253941	0.9028	No-diff
TMBIM1	Q969X1	0.0272039	0.9028	No-diff
ARSL	P51690	0.0279509	0.9028	No-diff
BPNT2	Q9NX62	0.0054405	0.9026	No-diff
DEK	P35659	6.82281e-05	0.9024	No-diff
HNRNPH3	P31942	0.000724369	0.9023	No-diff
PGAM5	Q96HS1	0.00504604	0.902	No-diff
DDX27	Q96GQ7	0.00885953	0.902	No-diff
STAU2	Q9NUL3	0.0028662	0.9019	No-diff
CPSF4	O95639	0.0148314	0.9019	No-diff
ERGIC1	Q969X5	0.0186814	0.9019	No-diff
MRPS35	P82673	0.00084126	0.9017	No-diff
PPP1R10	Q96QC0	0.00159443	0.9015	No-diff
NDUFS3	O75489	0.00226087	0.9015	No-diff
SRRT	Q9BXP5	0.00588813	0.9015	No-diff
RAB2A	P61019	0.0120559	0.9014	No-diff
NADK2	Q4G0N4	0.0063774	0.9013	No-diff
AATF	Q9NY61	0.000837233	0.9009	No-diff
ARHGEF11	O15085	0.0014051	0.9009	No-diff
SAMM50	Q9Y512	0.00180021	0.9009	No-diff
NDUFS1	P28331	0.000254641	0.9008	No-diff
CPT1A	Q9UHQ4	0.0464805	0.9006	No-diff
ADNP	Q9H2P0	0.000398114	0.9005	No-diff
PLIN3	O60664	9.5639e-07	0.9002	No-diff
SPTLC2	O15270	7.25656e-05	0.9002	No-diff
PRKDC	P78527	0.00371612	0.9001	No-diff
MRPL30	Q8TCC3	0.0121849	0.8999	No-diff
LDAH	Q9H6V9	0.0159078	0.8999	No-diff
RBM26	Q5T8P6	0.00054381	0.8998	No-diff
NEU1	Q99519	0.00737733	0.8998	No-diff
CBX8	Q9HC52	0.0421122	0.8993	No-diff
C1QBP	Q07021	0.00143186	0.8992	No-diff
UGGT1	Q9NYU2	0.000234907	0.8989	No-diff
SLTM	Q9NWH9	0.00764979	0.8987	No-diff
HELZ	P42694	0.0361013	0.8987	No-diff
MRPL24	Q96A35	0.0025159	0.8986	No-diff
ATP2A2	P16615	0.00246647	0.8982	No-diff
PAXBP1	Q9Y5B6	0.0214059	0.8982	No-diff
MGST3	O14880	0.0225015	0.8982	No-diff
MIA2	Q96PC5	0.00303602	0.898	No-diff
MTCH2	Q9Y6C9	0.000382758	0.8979	No-diff
AKAP17A	Q02040	0.0315911	0.8979	No-diff
SNX18	Q96RF0	0.000552214	0.8975	No-diff
ATP13A1	Q9HD20	0.00200816	0.8975	No-diff
GLYR1	Q49A26	0.000697123	0.8974	No-diff
TAF5	Q15542	0.000640034	0.8972	No-diff
GLDC	P23378	7.63504e-05	0.8971	No-diff
KNOP1	Q1ED39	0.040574	0.897	No-diff
PIGS	Q96S52	0.000198758	0.8969	No-diff
PRKAR2A	P13861	0.00258086	0.8969	No-diff
BSG	P35613	0.000198422	0.8967	No-diff
STX5	Q13190	0.00379404	0.8967	No-diff
MRPL37	Q9BZE1	0.0394409	0.8967	No-diff
AP1B1	Q10567	0.00229603	0.8965	No-diff
NLN	Q9BYT8	0.010239	0.8965	No-diff
SRSF7	Q16629	0.0237387	0.8965	No-diff
FABP1	P07148	6.01121e-05	0.8963	No-diff
SMU1	Q2TAY7	0.0175899	0.8962	No-diff
GLG1	Q92896	8.34748e-05	0.8961	No-diff
TBL3	Q12788	6.96247e-05	0.8958	No-diff
CFAP20	O75127	0.0467602	0.8958	No-diff
RBM15B	Q8NDT2	0.00510409	0.8957	No-diff
SSR1	P43307	0.000648995	0.8955	No-diff
CSTF3	Q12996	0.00178507	0.8953	No-diff
[truncated: 977 more rows]

## Sheet: Table S2.P53 related proteins
	Pathway in pathcards	Gene name
	Transcription P53 signaling pathway	APEX1
	Transcription P53 signaling pathway	ERCC2
	Transcription P53 signaling pathway	KDR
	Transcription P53 signaling pathway	RBBP4
	Transcription P53 signaling pathway	PIAS1
	Transcription P53 signaling pathway	ATM
	Transcription P53 signaling pathway	ERCC3
	Transcription P53 signaling pathway	MAP4
	Transcription P53 signaling pathway	RBBP7
	Transcription P53 signaling pathway	KAT2B
	Transcription P53 signaling pathway	ATR
	Transcription P53 signaling pathway	FHL2
	Transcription P53 signaling pathway	MDM2
	Transcription P53 signaling pathway	REL
	Transcription P53 signaling pathway	PIAS2
	Transcription P53 signaling pathway	BCL2
	Transcription P53 signaling pathway	FLT1
	Transcription P53 signaling pathway	MAP3K1
	Transcription P53 signaling pathway	RELA
	Transcription P53 signaling pathway	MTA2
	Transcription P53 signaling pathway	CDK2
	Transcription P53 signaling pathway	FOS
	Transcription P53 signaling pathway	MMP2
	Transcription P53 signaling pathway	RELB
	Transcription P53 signaling pathway	DUSP16
	Transcription P53 signaling pathway	CDKN1A
	Transcription P53 signaling pathway	GTF2H1
	Transcription P53 signaling pathway	NFKB1
	Transcription P53 signaling pathway	MAP2K4
	Transcription P53 signaling pathway	GTF2H5
	Transcription P53 signaling pathway	GTF2H2
	Transcription P53 signaling pathway	NFKB2
	Transcription P53 signaling pathway	TDG
	Transcription P53 signaling pathway	CDKN2A
	Transcription P53 signaling pathway	CREBBP
	Transcription P53 signaling pathway	GTF2H3
	Transcription P53 signaling pathway	MAPK8
	Transcription P53 signaling pathway	TP53
	Transcription P53 signaling pathway	CTNNB1
	Transcription P53 signaling pathway	GTF2H4
	Transcription P53 signaling pathway	MAPK9
	Transcription P53 signaling pathway	SUMO1
	Transcription P53 signaling pathway	E2F1
	Transcription P53 signaling pathway	HDAC2
	Transcription P53 signaling pathway	RANBP2
	Transcription P53 signaling pathway	XPA
	Transcription P53 signaling pathway	DUSP1
	Transcription P53 signaling pathway	HDAC1
	Transcription P53 signaling pathway	MAPK10
	Transcription P53 signaling pathway	VEGFA
	Transcription P53 signaling pathway	EP300
	Transcription P53 signaling pathway	HSPB1
	Transcription P53 signaling pathway	RB1
	Transcription P53 signaling pathway	XPC
	P53 signaling	HIPK2
	P53 signaling	HDAC1
	P53 signaling	SIRT7
	P53 signaling	TNFRSF10B
	P53 signaling	GADD45B
	P53 signaling	CASP14
	P53 signaling	HDAC5
	P53 signaling	KAT2B
	P53 signaling	PSMB3
	P53 signaling	PSMD2
	P53 signaling	PTEN
	P53 signaling	HDAC10
	P53 signaling	CASP1
	P53 signaling	MAPK14
	P53 signaling	GADD45G
	P53 signaling	BCL2L1
	P53 signaling	HDAC6
	P53 signaling	PML
	P53 signaling	PSMB4
	P53 signaling	PSMD3
	P53 signaling	TP53
	P53 signaling	HDAC11
	P53 signaling	CASP10
	P53 signaling	BCL2
	P53 signaling	CDK2
	P53 signaling	ABL1
	P53 signaling	HDAC7
	P53 signaling	PRKDC
	P53 signaling	PSMB5
	P53 signaling	PSMD4
	P53 signaling	BAX
	P53 signaling	HDAC2
	P53 signaling	CASP2
	P53 signaling	AKT1
	P53 signaling	CDK4
	P53 signaling	ATM
	P53 signaling	HDAC9
	P53 signaling	PSMA1
	P53 signaling	PSMB6
	P53 signaling	PSMD5
	P53 signaling	PIAS1
	P53 signaling	HDAC3
	P53 signaling	CASP3
	P53 signaling	AKT2
	P53 signaling	CCNE1
	P53 signaling	ATR
	P53 signaling	MAPK10
	P53 signaling	PSMA2
	P53 signaling	PSMB7
	P53 signaling	SFN
	P53 signaling	BRCA1
	P53 signaling	HDAC8
	P53 signaling	CASP4
	P53 signaling	AKT3
	P53 signaling	MAPK1
	P53 signaling	ADGRB1
	P53 signaling	MAPK11
	P53 signaling	PSMA3
	P53 signaling	PSMC1
	P53 signaling	THBS1
	P53 signaling	MDM2
	P53 signaling	SIRT1
	P53 signaling	CASP5
	P53 signaling	CHEK1
	P53 signaling	MAPK6
	P53 signaling	CCND1
	P53 signaling	MAPK12
	P53 signaling	PSMA4
	P53 signaling	PSMC2
	P53 signaling	UBB
	P53 signaling	RB1
	P53 signaling	SIRT2
	P53 signaling	CASP6
	P53 signaling	CHEK2
	P53 signaling	MAPK7
	P53 signaling	CSNK1D
	P53 signaling	MAPK13
	P53 signaling	PSMA5
	P53 signaling	PSMC3
	P53 signaling	UBC
	P53 signaling	E2F2
	P53 signaling	SIRT3
	P53 signaling	CASP7
	P53 signaling	GSK3B
	P53 signaling	FASLG
	P53 signaling	E2F1
	P53 signaling	MAPK8
	P53 signaling	PSMA6
	P53 signaling	PSMC4
	P53 signaling	UBD
	P53 signaling	E2F3
	P53 signaling	SIRT4
	P53 signaling	CASP8
	P53 signaling	HIF1A
	P53 signaling	TNFSF10
	P53 signaling	E2F4
	P53 signaling	MAPK9
	P53 signaling	PSMA7
	P53 signaling	PSMC5
	P53 signaling	FOS
	P53 signaling	SIRT5
	P53 signaling	CASP9
	P53 signaling	DDR1
	P53 signaling	PPIF
	P53 signaling	E2F5
	P53 signaling	MGC16025
	P53 signaling	PSMB1
	P53 signaling	PSMC6
	P53 signaling	CDKN1A
	P53 signaling	SIRT6
	P53 signaling	FAS
	P53 signaling	GADD45A
	P53 signaling	HDAC4
	P53 signaling	EP300
	P53 signaling	PSMD6
	P53 signaling	PSMB2
	P53 signaling	PSMD1
	p53 pathway	FBXO11
	p53 pathway	PTPA
	p53 pathway	RPL11
	p53 pathway	PPP2CA
	p53 pathway	DAXX
	p53 pathway	UBE2D1
	p53 pathway	MAPK14
	p53 pathway	KAT2B
	p53 pathway	ATM
	p53 pathway	CDKN2A
	p53 pathway	NEDD8
	p53 pathway	PRMT5
	p53 pathway	KAT5
	p53 pathway	YY1
	p53 pathway	TRIM28
	p53 pathway	SETD7
	p53 pathway	HIPK2
	p53 pathway	CCNG1
	p53 pathway	CHEK1
	p53 pathway	DYRK2
	p53 pathway	KAT8
	p53 pathway	CSE1L
	p53 pathway	ABL1
	p53 pathway	USP7
	p53 pathway	SKP2
	p53 pathway	E4F1
	p53 pathway	CCNA2
	p53 pathway	KMT5A
	p53 pathway	HUWE1
	p53 pathway	TTC5
	p53 pathway	CDK2
	p53 pathway	SMYD2
	p53 pathway	CHEK2
	p53 pathway	COP1
	p53 pathway	AKT1
	p53 pathway	RPL5
	p53 pathway	TP53
	p53 pathway	PPP1R13L
	p53 pathway	MAPK8
	p53 pathway	MDM4
	p53 pathway	MDM2
	p53 pathway	RCHY1
	p53 pathway	GSK3B
	p53 pathway	PPM1D
	p53 pathway	PIN1
	p53 pathway	TP53AIP1
	p53 pathway	PRKCD
	p53 pathway	RPL23
	p53 pathway	ATR
		RASSF1

## Sheet: Table S3.PPAR related proteins
Pathway in pathcards	Gene name
PPARA activates gene expression	MED6
PPARA activates gene expression	MED13L
PPARA activates gene expression	RXRA
PPARA activates gene expression	FAM120B
PPARA activates gene expression	MED7
PPARA activates gene expression	APOA5
PPARA activates gene expression	ALAS1
PPARA activates gene expression	HMGCS1
PPARA activates gene expression	NFYB
PPARA activates gene expression	SP1
PPARA activates gene expression	CEBPA
PPARA activates gene expression	PCK1
PPARA activates gene expression	ADIPOQ
PPARA activates gene expression	MED16
PPARA activates gene expression	MED4
PPARA activates gene expression	SMARCD3
PPARA activates gene expression	HELZ2
PPARA activates gene expression	MED20
PPARA activates gene expression	PLIN2
PPARA activates gene expression	FABP1
PPARA activates gene expression	HMGCS2
PPARA activates gene expression	NFYC
PPARA activates gene expression	SULT2A1
PPARA activates gene expression	CEBPB
PPARA activates gene expression	PLIN1
PPARA activates gene expression	CDK8
PPARA activates gene expression	MED11
PPARA activates gene expression	SREBF1
PPARA activates gene expression	NCOA1
PPARA activates gene expression	CD36
PPARA activates gene expression	PPARGC1B
PPARA activates gene expression	ACSL1
PPARA activates gene expression	APOA1
PPARA activates gene expression	NPAS2
PPARA activates gene expression	TXNRD1
PPARA activates gene expression	CEBPD
PPARA activates gene expression	RELA
PPARA activates gene expression	CARM1
PPARA activates gene expression	MED31
PPARA activates gene expression	SREBF2
PPARA activates gene expression	HDAC3
PPARA activates gene expression	NCOR1
PPARA activates gene expression	CPT1A
PPARA activates gene expression	FDFT1
PPARA activates gene expression	APOA2
PPARA activates gene expression	NRF1
PPARA activates gene expression	NR1H2
PPARA activates gene expression	ADIRF
PPARA activates gene expression	SLC2A4
PPARA activates gene expression	NCOA2
PPARA activates gene expression	ANGPTL4
PPARA activates gene expression	MED22
PPARA activates gene expression	CCNC
PPARA activates gene expression	NCOR2
PPARA activates gene expression	CPT2
PPARA activates gene expression	FHL2
PPARA activates gene expression	ACADM
PPARA activates gene expression	G0S2
PPARA activates gene expression	PEX11A
PPARA activates gene expression	ZNF467
PPARA activates gene expression	KLF5
PPARA activates gene expression	PPARGC1A
PPARA activates gene expression	MED15
PPARA activates gene expression	TBL1X
PPARA activates gene expression	MED30
PPARA activates gene expression	TGS1
PPARA activates gene expression	CYP1A1
PPARA activates gene expression	RGL1
PPARA activates gene expression	SLC27A1
PPARA activates gene expression	ACOX1
PPARA activates gene expression	NR1D1
PPARA activates gene expression	EBF1
PPARA activates gene expression	NR2F2
PPARA activates gene expression	MED8
PPARA activates gene expression	PPARA
PPARA activates gene expression	TBL1XR1
PPARA activates gene expression	MED14
PPARA activates gene expression	MED24
PPARA activates gene expression	CYP4A11
PPARA activates gene expression	TIAM2
PPARA activates gene expression	FADS1
PPARA activates gene expression	ABCB4
PPARA activates gene expression	CLOCK
PPARA activates gene expression	EGR2
PPARA activates gene expression	TGFB1
PPARA activates gene expression	CREBBP
PPARA activates gene expression	PPARG
PPARA activates gene expression	CHD9
PPARA activates gene expression	MED21
PPARA activates gene expression	THRAP3
PPARA activates gene expression	CYP7A1
PPARA activates gene expression	ANKRD1
PPARA activates gene expression	ARNT
PPARA activates gene expression	UGT1A9
PPARA activates gene expression	ARNT2
PPARA activates gene expression	FABP4
PPARA activates gene expression	TNF
PPARA activates gene expression	EP300
PPARA activates gene expression	MED1
PPARA activates gene expression	MED28
PPARA activates gene expression	MED23
PPARA activates gene expression	MED12
PPARA activates gene expression	AGT
PPARA activates gene expression	TNFRSF21
PPARA activates gene expression	BMAL1
PPARA activates gene expression	AHRR
PPARA activates gene expression	NR1H4
PPARA activates gene expression	ZNF638
PPARA activates gene expression	WNT1
PPARA activates gene expression	MED19
PPARA activates gene expression	MED18
PPARA activates gene expression	MED25
PPARA activates gene expression	MED17
PPARA activates gene expression	MED13
PPARA activates gene expression	ABCA1
PPARA activates gene expression	GPS2
PPARA activates gene expression	ME1
PPARA activates gene expression	TRIB3
PPARA activates gene expression	SIN3B
PPARA activates gene expression	LEP
PPARA activates gene expression	WNT10B
PPARA activates gene expression	NCOA6
PPARA activates gene expression	MED9
PPARA activates gene expression	NCOA3
PPARA activates gene expression	MED26
PPARA activates gene expression	NR1H3
PPARA activates gene expression	AHR
PPARA activates gene expression	GRHL1
PPARA activates gene expression	MTF1
PPARA activates gene expression	RORA
PPARA activates gene expression	SIN3A
PPARA activates gene expression	LPL
PPARA activates gene expression	CCND3
PPARA activates gene expression	CDK19
PPARA activates gene expression	MED29
PPARA activates gene expression	MED10
PPARA activates gene expression	MED27
PPARA activates gene expression	GLIPR1
PPARA activates gene expression	ESRRA
PPARA activates gene expression	HMGCR
PPARA activates gene expression	NFYA
PPARA activates gene expression	RXRB
PPARA activates gene expression	CDK4
PPARA activates gene expression	NFKB1
PPARA activates gene expression	KLF4
PPAR signaling pathway	FABP4
PPAR signaling pathway	ACSBG1
PPAR signaling pathway	CPT1B
PPAR signaling pathway	ACADL
PPAR signaling pathway	ACOX1
PPAR signaling pathway	RXRG
PPAR signaling pathway	SLC27A4
PPAR signaling pathway	ACSL6
PPAR signaling pathway	CPT2
PPAR signaling pathway	APOA1
PPAR signaling pathway	PCK1
PPAR signaling pathway	SCD
PPAR signaling pathway	DBI
PPAR signaling pathway	ACSL5
PPAR signaling pathway	CYP4A11
PPAR signaling pathway	APOA2
PPAR signaling pathway	PCK2
PPAR signaling pathway	SCP2
PPAR signaling pathway	FABP1
PPAR signaling pathway	ACSBG2
PPAR signaling pathway	CYP7A1
PPAR signaling pathway	ACADM
PPAR signaling pathway	ANGPTL4
PPAR signaling pathway	UCP1
PPAR signaling pathway	FABP2
PPAR signaling pathway	CD36
PPAR signaling pathway	CYP8B1
PPAR signaling pathway	APOC3
PPAR signaling pathway	PDPK1
PPAR signaling pathway	ACOX2
PPAR signaling pathway	FABP3
PPAR signaling pathway	NR1H3
PPAR signaling pathway	CYP27A1
PPAR signaling pathway	ILK
PPAR signaling pathway	PLIN1
PPAR signaling pathway	ACOX3
PPAR signaling pathway	FABP5
PPAR signaling pathway	SORBS1
PPAR signaling pathway	EHHADH
PPAR signaling pathway	AQP7
PPAR signaling pathway	PLTP
PPAR signaling pathway	ADIPOQ
PPAR signaling pathway	FABP6
PPAR signaling pathway	SLC27A5
PPAR signaling pathway	GK2
PPAR signaling pathway	SLC27A1
PPAR signaling pathway	PPARA
PPAR signaling pathway	FADS2
PPAR signaling pathway	FABP7
PPAR signaling pathway	SLC27A2
PPAR signaling pathway	GK3
PPAR signaling pathway	LPL
PPAR signaling pathway	PPARD
PPAR signaling pathway	FABP9
PPAR signaling pathway	ACSL1
PPAR signaling pathway	APOA5
PPAR signaling pathway	SLC27A6
PPAR signaling pathway	ME1
PPAR signaling pathway	PPARG
PPAR signaling pathway	ACSL3
PPAR signaling pathway	CPT1C
PPAR signaling pathway	ACAA1
PPAR signaling pathway	MMP1
PPAR signaling pathway	RXRA
PPAR signaling pathway	ACSL4
PPAR signaling pathway	CPT1A
PPAR signaling pathway	HMGCS2
PPAR signaling pathway	OLR1
PPAR signaling pathway	RXRB

## Sheet: Table S4.candidate protein
T12 VS T0	P53 related proteins	PPAR related proteins	..count..	values
TRUE	TRUE	TRUE	2	FHL2|RELA
FALSE	TRUE	TRUE	4	EP300|CDK4|HDAC3|NFKB1
TRUE	FALSE	TRUE	5	HMGCR|HMGCS1|ALAS1|ACOX3|HMGCS2
FALSE	FALSE	TRUE	176	RXRA|APOA5|PCK1|ADIPOQ|FABP1|PLIN1|CD36|ACSL1|APOA1|CPT1A|APOA2|ANGPTL4|CPT2|ACADM|SLC27A1|ACOX1|PPARA|CYP4A11|PPARG|CYP7A1|FABP4|ME1|NR1H3|LPL|RACSBG1|CPT1B|ACADL|RXRG|SLC27A4|ACSL6|SCD|DBI|ACSL5|PCK2|SCP2|ACSBG2|UCP1|FABP2|CYP8B1|APOC3|PDPK1|ACOX2|FABP3|CYP27A1|ILK|FABP5|SORBS1|EHHADH|AQP7|PLTP|FABP6|SLC27A5|GK2|FADS2|FABP7|SLC27A2|GK3|PPARD|FABP9|SLC27A6|ACSL3|CPT1|ACAA1|MMP1|ACSL4|OLR1XRB|MED…
TRUE	TRUE	FALSE	3	CCND1|CCNA2|XPC
FALSE	TRUE	FALSE	179	ATM|KAT2B|ATR|MDM2|CDK2|MAPK8|P53|HIPK2|MAPK14|ABL1|AKT1|CHEK1|CHEK2|GSK3B|CDKN2A|BXO11|PTPA|RPL11|PPP2CA|DAXX|UBE2D1|NEDD8|PRMT5|KAT5|YY1|TRIM28|SETD7|CCNG|DYRK2|KAT8|CSE1L|USP7|SKP2|E4F1|KMT5A|HUWE1|TTC5|SMYD2|COP1|RPL5|PPP1R13L|MDM4|RCHY1|PPM1D|PIN1|TP53AIP1|PRKCD|RPL23|RASSF1|PIAS1|BCL2|FOS|CDKN1A|MAPK9|E2F1|HDAC2|HDAC1|MAPK10|RB1|SIRT7|TNFRSF10B|GADD45B|CASP14|HDAC5|PSMB3|PSMD2|PTEN|HDAC10|C…
TRUE	FALSE	FALSE	189	HKDC1|PCLAF|TSR2|BUB1|HMMR|CDC20|CENPE|NFXL1|DEGS1|FTL|TTLL4|FTH1|OCC1|SGO2|STK31|UBE2S|MYL9|UBR7|MKLN1|SQSTM1|ARHGDIB|GLUL|ANLN|RRN3|TACC3|MKRN2|CIZ1|MTR|SULT1C4|GMNN|OTUD5|VWA1|KIF18B|SHCBP1|RAD18|ZWINT|NES|AURKA|UBE2C|PLK1|SAMD4A|LATS1|XIAP|ASPM|MAP1LC3B2|CCNB1|RAD51|CKS1B|SNX17|TSR3|ZFAND3|FAM83D|ZC3H7B|ZNF629|DNA2|MYRF|CDC7|LIMD1|ADI1|UCK2|TRAFD1|CNBP|SARAF|TK1|HECTD1|UNC13D|MCM10|PRC1|LRRC4…
